# Supplementary material for: Synthesis and Evaluation of Novel Nitric Oxide-Donating Ligustrazine Derivatives as Potent Antiplatelet Aggregation Agents
Source: MDPI journal article supplement (doi:10.3390/molecules28083355), 2023-04-11
Supplement: s1 [file s1]

## Supplementary Materials

### Synthesis and evaluation of novel nitric oxide-donating ligustrazine derivatives as potent antiplatelet aggregation agents

Han-Xu Li, Jian-Hui Tian, Hua-Yu Li, Xin Wan and Yu Zou\*

*Institute of Pharmaceutical Process, Hubei Province Key Laboratory of Occupational Hazard Identification and Control, School of Medicine, Wuhan University of Science and Technology, Wuhan 430065, China*

\*Correspondence: zouyu@wust.edu.cn

|      |                                                                                                                                               |     |
|------|-----------------------------------------------------------------------------------------------------------------------------------------------|-----|
| 1    | Table S1: The IC <sub>50</sub> values of target compounds against platelet aggregation in vitro induced by ADP or AA.....                     | S4  |
| 2    | Table S2: Docking energies of ligustrazine (TMP) and all new compounds ( <b>13</b> , <b>14a-14e</b> , <b>15a-15e</b> ) with TBXA2R.....       | S4  |
| 3    | Binding modes of all the compounds at active site of TBXA2R                                                                                   |     |
| 3.1  | Figure S1. Possible binding mode of TMP at active site of TBXA2R.....                                                                         | S5  |
| 3.2  | Figure S2. Possible binding mode of <b>13</b> at active site of TBXA2R.....                                                                   | S6  |
| 3.3  | Figure S3. Possible binding mode of <b>14a</b> at active site of TBXA2R.....                                                                  | S7  |
| 3.4  | Figure S4. Possible binding mode of <b>14b</b> at active site of TBXA2R.....                                                                  | S8  |
| 3.5  | Figure S5. Possible binding mode of <b>14c</b> at active site of TBXA2R.....                                                                  | S9  |
| 3.6  | Figure S6. Possible binding mode of <b>14d</b> at active site of TBXA2R.....                                                                  | S10 |
| 3.7  | Figure S7. Possible binding mode of <b>14e</b> at active site of TBXA2R.....                                                                  | S11 |
| 3.8  | Figure S8. Possible binding mode of <b>15a</b> at active site of TBXA2R.....                                                                  | S12 |
| 3.9  | Figure S9. Possible binding mode of <b>15b</b> at active site of TBXA2R.....                                                                  | S13 |
| 3.10 | Figure S10. Possible binding mode of <b>15c</b> at active site of TBXA2R.....                                                                 | S14 |
| 3.11 | Figure S11. Possible binding mode of <b>15d</b> at active site of TBXA2R.....                                                                 | S15 |
| 3.12 | Figure S12. Possible binding mode of <b>15e</b> at active site of TBXA2R.....                                                                 | S16 |
| 4    | NMR spectra of all new compounds                                                                                                              |     |
| 4.1  | Figure S13. <sup>1</sup> H NMR spectrum of 2-(nitrooxy)ethyl (E)-3-(3,5,6-trimethylpyrazin-2-yl)acrylate ( <b>13</b> ).....                   | S17 |
| 4.2  | Figure S14. <sup>1</sup> H NMR spectrum of 2-(nitrooxy)ethyl (E)-2-((3-(3,5,6-trimethylpyrazin-2-yl)acryloyl)oxy)benzoate ( <b>14a</b> )..... | S17 |
| 4.3  | Figure S15. <sup>1</sup> H NMR spectrum of 2-(nitrooxy)ethyl (E)-3-((3-(3,5,6-trimethylpyrazin-2-yl)acryloyl)oxy)benzoate ( <b>14b</b> )..... | S18 |
| 4.4  | Figure S16. <sup>1</sup> H NMR spectrum of 2-(nitrooxy)ethyl (E)-4-((3-(3,5,6-trimethylpyrazin-2-yl)acryloyl)oxy)benzoate ( <b>14c</b> )..... | S18 |
| 4.5  | Figure S17. <sup>1</sup> H NMR spectrum of 4-(nitrooxy)butyl (E)-2-((3-(3,5,6-trimethylpyrazin-2-yl)acryloyl)oxy)benzoate ( <b>14d</b> )..... | S19 |
| 4.6  | Figure S18. <sup>1</sup> H NMR spectrum of 6-(nitrooxy)hexyl (E)-2-((3-(3,5,6-trimethylpyrazin-2-yl)acryloyl)oxy)benzoate ( <b>14e</b> )..... | S19 |

|      |                                                                                                                                                |     |
|------|------------------------------------------------------------------------------------------------------------------------------------------------|-----|
| 4.7  | Figure S19. <sup>1</sup> H NMR spectrum of (3,5,6-trimethylpyrazin-2-yl)methyl 2-(2-(nitrooxy)ethoxy)benzoate ( <b>15a</b> ).....              | S20 |
| 4.8  | Figure S20. <sup>1</sup> H NMR spectrum of (3,5,6-trimethylpyrazin-2-yl)methyl 3-(2-(nitrooxy)ethoxy)benzoate ( <b>15b</b> ).....              | S20 |
| 4.9  | Figure S21. <sup>1</sup> H NMR spectrum of (3,5,6-trimethylpyrazin-2-yl)methyl 4-(2-(nitrooxy)ethoxy)benzoate ( <b>15c</b> ).....              | S21 |
| 4.10 | Figure S22. <sup>1</sup> H NMR spectrum of (3,5,6-trimethylpyrazin-2-yl)methyl 3-(4-(nitrooxy)butoxy)benzoate ( <b>15d</b> ).....              | S21 |
| 4.11 | Figure S23. <sup>1</sup> H NMR spectrum of (3,5,6-trimethylpyrazin-2-yl)methyl 3-((6-(nitrooxy)hexyl)oxy)benzoate ( <b>15e</b> ).....          | S22 |
| 4.12 | Figure S24. <sup>13</sup> C NMR spectrum of 2-(nitrooxy)ethyl (E)-3-(3,5,6-trimethylpyrazin-2-yl)acrylate ( <b>13</b> ).....                   | S22 |
| 4.13 | Figure S25. <sup>13</sup> C NMR spectrum of 2-(nitrooxy)ethyl (E)-2-((3-(3,5,6-trimethylpyrazin-2-yl)acryloyl)oxy)benzoate ( <b>14a</b> )..... | S23 |
| 4.14 | Figure S26. <sup>13</sup> C NMR spectrum of 2-(nitrooxy)ethyl (E)-3-((3-(3,5,6-trimethylpyrazin-2-yl)acryloyl)oxy)benzoate ( <b>14b</b> )..... | S23 |
| 4.15 | Figure S27. <sup>13</sup> C NMR spectrum of 2-(nitrooxy)ethyl (E)-4-((3-(3,5,6-trimethylpyrazin-2-yl)acryloyl)oxy)benzoate ( <b>14c</b> )..... | S24 |
| 4.16 | Figure S28. <sup>13</sup> C NMR spectrum of 4-(nitrooxy)butyl (E)-2-((3-(3,5,6-trimethylpyrazin-2-yl)acryloyl)oxy)benzoate ( <b>14d</b> )..... | S24 |
| 4.17 | Figure S29. <sup>13</sup> C NMR spectrum of 6-(nitrooxy)hexyl (E)-2-((3-(3,5,6-trimethylpyrazin-2-yl)acryloyl)oxy)benzoate ( <b>14e</b> )..... | S25 |
| 4.18 | Figure S30. <sup>13</sup> C NMR spectrum of (3,5,6-trimethylpyrazin-2-yl)methyl 2-(2-(nitrooxy)ethoxy)benzoate ( <b>15a</b> ).....             | S25 |
| 4.19 | Figure S31. <sup>13</sup> C NMR spectrum of (3,5,6-trimethylpyrazin-2-yl)methyl 3-(2-(nitrooxy)ethoxy)benzoate ( <b>15b</b> ).....             | S26 |
| 4.20 | Figure S32. <sup>13</sup> C NMR spectrum of (3,5,6-trimethylpyrazin-2-yl)methyl 4-(2-(nitrooxy)ethoxy)benzoate ( <b>15c</b> ).....             | S26 |
| 4.21 | Figure S33. <sup>13</sup> C NMR spectrum of (3,5,6-trimethylpyrazin-2-yl)methyl 3-(4-(nitrooxy)butoxy)benzoate ( <b>15d</b> ).....             | S27 |
| 4.22 | Figure S34. <sup>13</sup> C NMR spectrum of (3,5,6-trimethylpyrazin-2-yl)methyl 3-((6-(nitrooxy)hexyl)oxy)benzoate ( <b>15e</b> ).....         | S27 |
| 5    | HRMS spectra of all new compounds                                                                                                              |     |
| 5.1  | Figure S35. HRMS spectrum of 2-(nitrooxy)ethyl (E)-3-(3,5,6-trimethylpyrazin-2-yl)acrylate ( <b>13</b> ).....                                  | S28 |
| 5.2  | Figure S36. HRMS spectrum of 2-(nitrooxy)ethyl (E)-2-((3-(3,5,6-trimethylpyrazin-2-yl)acryloyl)oxy)benzoate ( <b>14a</b> ).....                | S28 |
| 5.3  | Figure S37. HRMS spectrum of 2-(nitrooxy)ethyl (E)-3-((3-(3,5,6-trimethylpyrazin-2-yl)acryloyl)oxy)benzoate ( <b>14b</b> ).....                | S29 |
| 5.4  | Figure S38. HRMS spectrum of 2-(nitrooxy)ethyl (E)-4-((3-(3,5,6-trimethylpyrazin-2-yl)acryloyl)oxy)benzoate ( <b>14c</b> ).....                | S29 |
| 5.5  | Figure S39. HRMS spectrum of 4-(nitrooxy)butyl (E)-2-((3-(3,5,6-trimethylpyrazin-2-yl)acryloyl)oxy)benzoate ( <b>14d</b> ).....                | S30 |
| 5.6  | Figure S40. HRMS spectrum of 6-(nitrooxy)hexyl (E)-2-                                                                                          |     |

|      |                                                                                                                            |     |
|------|----------------------------------------------------------------------------------------------------------------------------|-----|
|      | ((3-(3,5,6-trimethylpyrazin-2-yl)acryloyl)oxy)benzoate ( <b>14e</b> ).....                                                 | S30 |
| 5.7  | Figure S41. HRMS spectrum of (3,5,6-trimethylpyrazin-2-yl)methyl<br>2-(2-(nitrooxy)ethoxy)benzoate ( <b>15a</b> ).....     | S31 |
| 5.8  | Figure S42. HRMS spectrum of (3,5,6-trimethylpyrazin-2-yl)methyl<br>3-(2-(nitrooxy)ethoxy)benzoate ( <b>15b</b> ).....     | S31 |
| 5.9  | Figure S43. HRMS spectrum of (3,5,6-trimethylpyrazin-2-yl)methyl<br>4-(2-(nitrooxy)ethoxy)benzoate ( <b>15c</b> ).....     | S32 |
| 5.10 | Figure S44. HRMS spectrum of (3,5,6-trimethylpyrazin-2-yl)methyl<br>3-(4-(nitrooxy)butoxy)benzoate ( <b>15d</b> ).....     | S32 |
| 5.11 | Figure S45. HRMS spectrum of (3,5,6-trimethylpyrazin-2-yl)methyl<br>3-((6-(nitrooxy)hexyl)oxy)benzoate ( <b>15e</b> )..... | S33 |

**Table S1.** The IC<sub>50</sub> values of target compounds against platelet aggregation in vitro induced by ADP or AA. (Mean  $\pm$  SD, n = 5)

| Compound   | IC <sub>50</sub> (mM) |                   |
|------------|-----------------------|-------------------|
|            | ADP (10 $\mu$ M)      | AA (1mM)          |
| TMP        | 1.1100 $\pm$ 0.07     | 0.8155 $\pm$ 0.08 |
| <b>13</b>  | 2.0810 $\pm$ 0.09     | 1.7120 $\pm$ 0.21 |
| <b>14a</b> | 0.7736 $\pm$ 0.08     | 0.6232 $\pm$ 0.05 |
| <b>14b</b> | 1.7830 $\pm$ 0.15     | 1.2390 $\pm$ 0.15 |
| <b>14c</b> | 2.2970 $\pm$ 0.20     | 1.8830 $\pm$ 0.14 |
| <b>14d</b> | 1.4380 $\pm$ 0.18     | 1.0400 $\pm$ 0.08 |
| <b>14e</b> | 2.5180 $\pm$ 0.26     | 2.3080 $\pm$ 0.30 |
| <b>15a</b> | 1.1710 $\pm$ 0.09     | 1.6270 $\pm$ 0.16 |
| <b>15b</b> | 0.7854 $\pm$ 0.06     | 0.8505 $\pm$ 0.03 |
| <b>15c</b> | 0.9230 $\pm$ 0.08     | 0.9658 $\pm$ 0.09 |
| <b>15d</b> | 0.7347 $\pm$ 0.07     | 0.5565 $\pm$ 0.03 |
| <b>15e</b> | 1.2060 $\pm$ 0.08     | 0.9412 $\pm$ 0.07 |

**Table S2:** Docking energies of ligustrazine (TMP) and all new compounds (**13**, **14a-14e**, **15a-15e**) with TBXA2R

| Compound   | -CDOCKER_INTERACTION_ENERGY, | -CDOCKER_ENERGY, |
|------------|------------------------------|------------------|
|            | kcal/mol                     | kcal/mol         |
| TMP        | 22.6805                      | 15.7133          |
| <b>13</b>  | 43.7139                      | 26.4085          |
| <b>14a</b> | 57.2490                      | 30.5841          |
| <b>14b</b> | 56.3094                      | 38.3704          |
| <b>14c</b> | 57.3570                      | 38.5336          |
| <b>14d</b> | 60.4573                      | 28.8552          |
| <b>14e</b> | 56.2685                      | 25.4620          |
| <b>15a</b> | 52.6835                      | 27.3096          |
| <b>15b</b> | 54.9192                      | 35.3326          |
| <b>15c</b> | 53.8605                      | 29.0482          |
| <b>15d</b> | 61.9653                      | 42.8464          |
| <b>15e</b> | 62.0654                      | 38.7112          |

## Binding modes of all the compounds at active site of TBXA2R

A

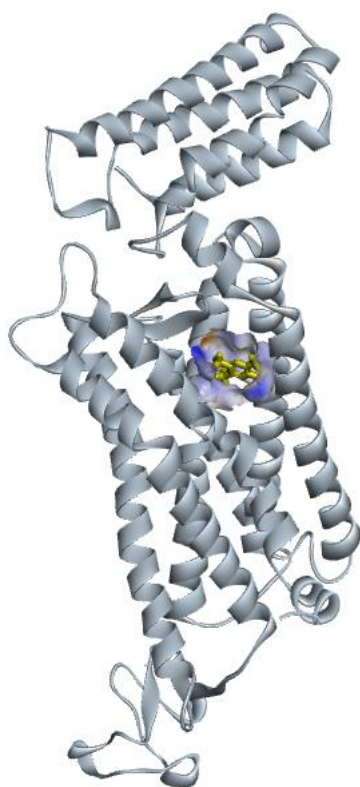

B

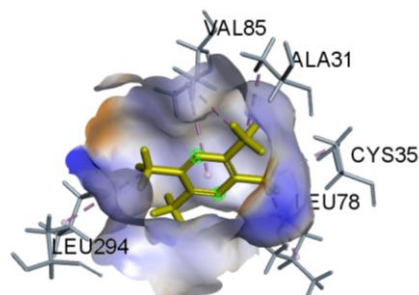

C

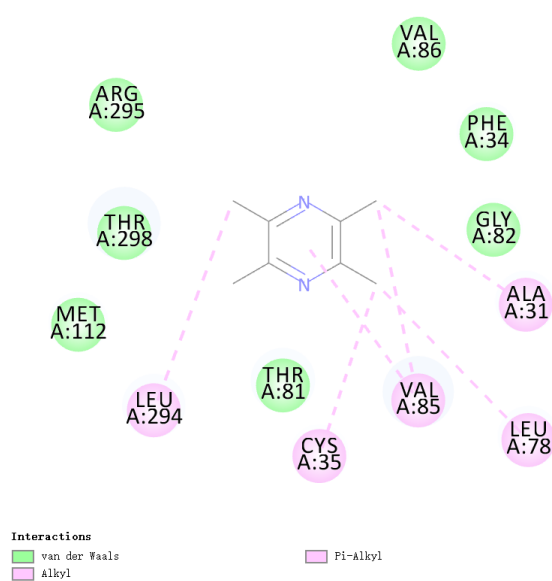

Figure S1. Possible binding mode of TMP at active site of TBXA2R.

A

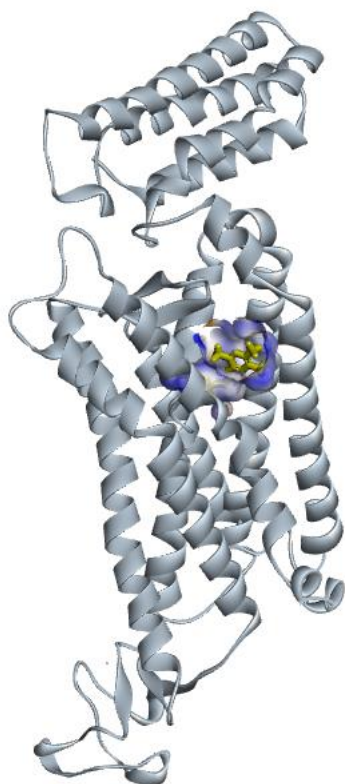

B

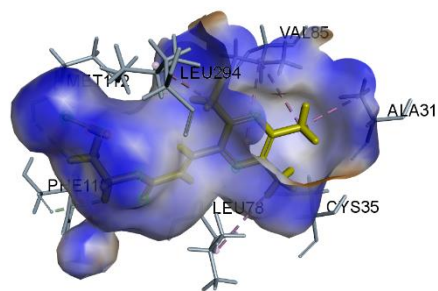

C

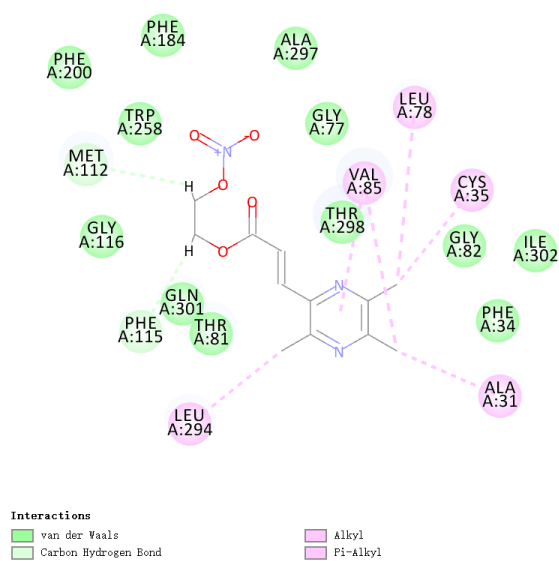

Figure S2. Possible binding mode of **13** at active site of TBXA2R.

A

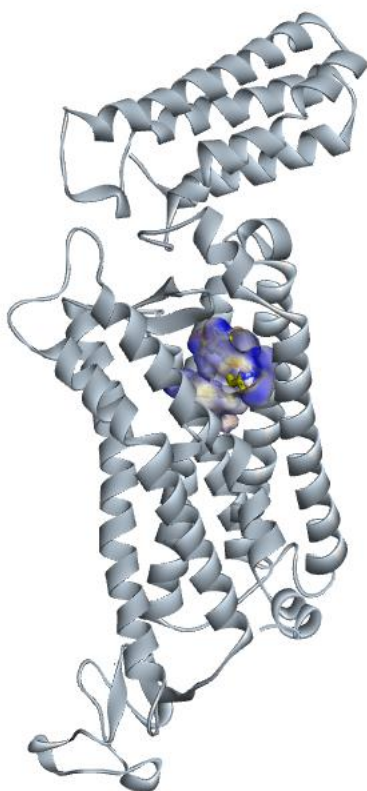

B

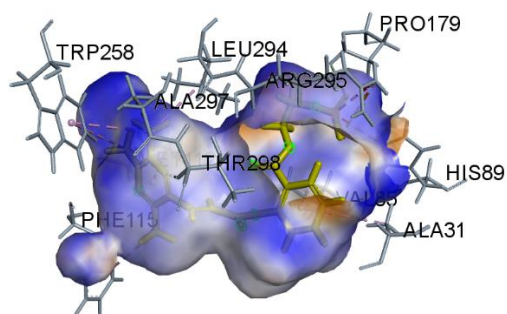

C

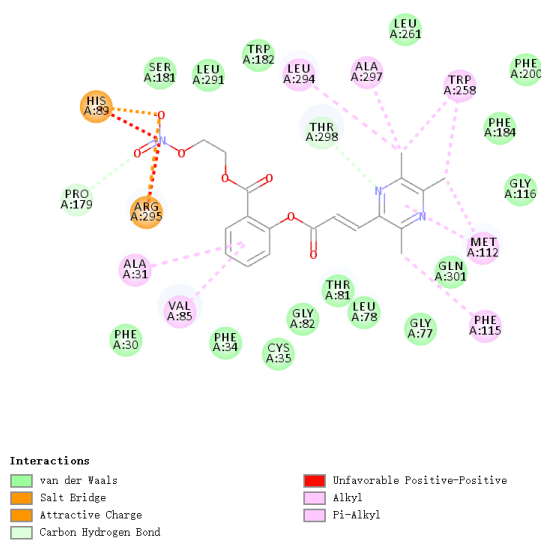

Figure S3. Possible binding mode of **14a** at active site of TBXA2R.

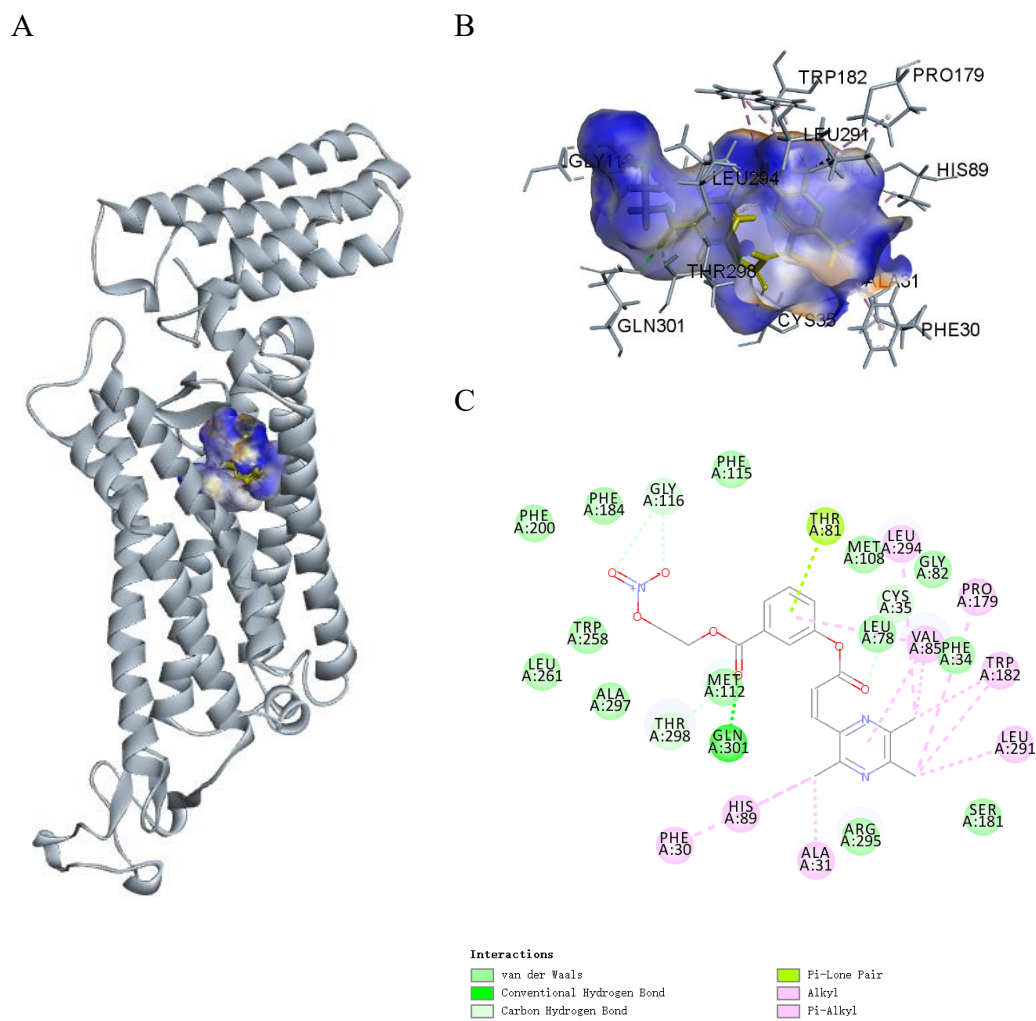

Figure S4. Possible binding mode of **14b** at active site of TBXA2R.



A

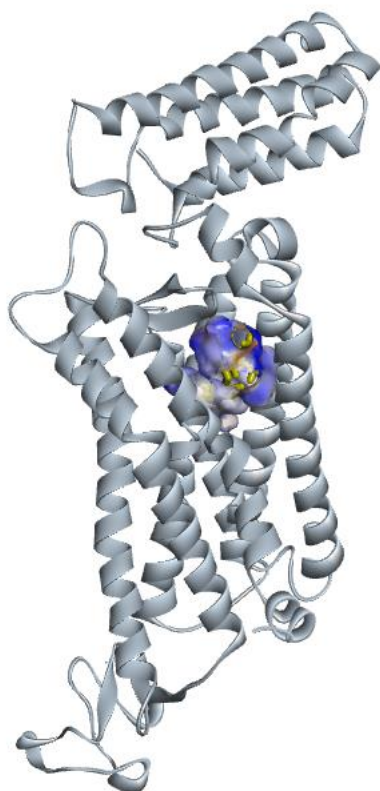

B

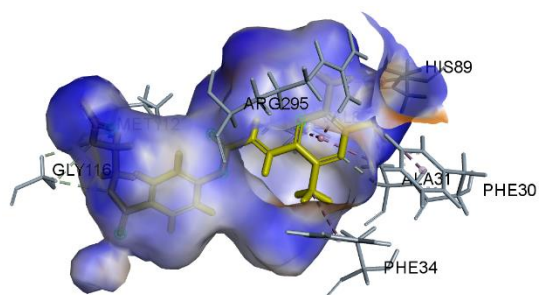

C

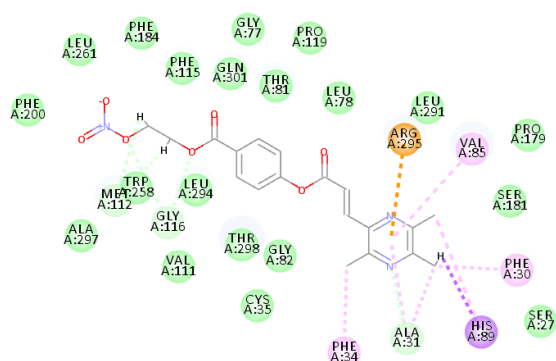

## Interactions

- |                      |          |
|----------------------|----------|
| van der Waals        | Pi-Sigma |
| Carbon Hydrogen Bond | alkyl    |
| Pi-Cation            | Pi-Alkyl |

Figure S5. Possible binding mode of **14c** at active site of TBXA2R.

A

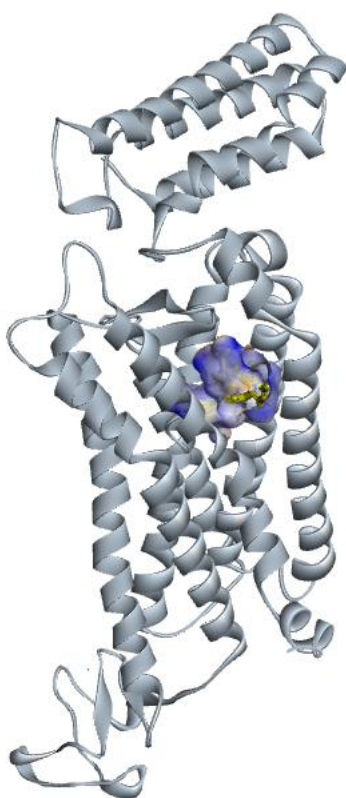

B

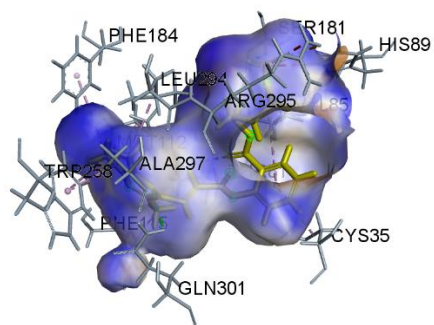

C

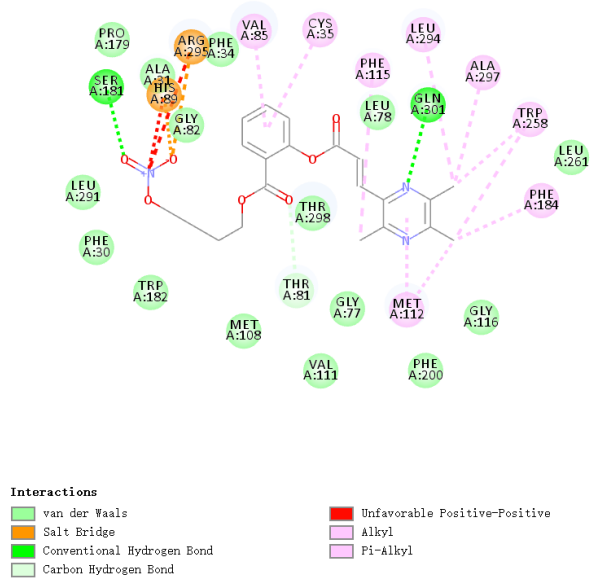

Figure S6. Possible binding mode of **14d** at active site of TBXA2R.

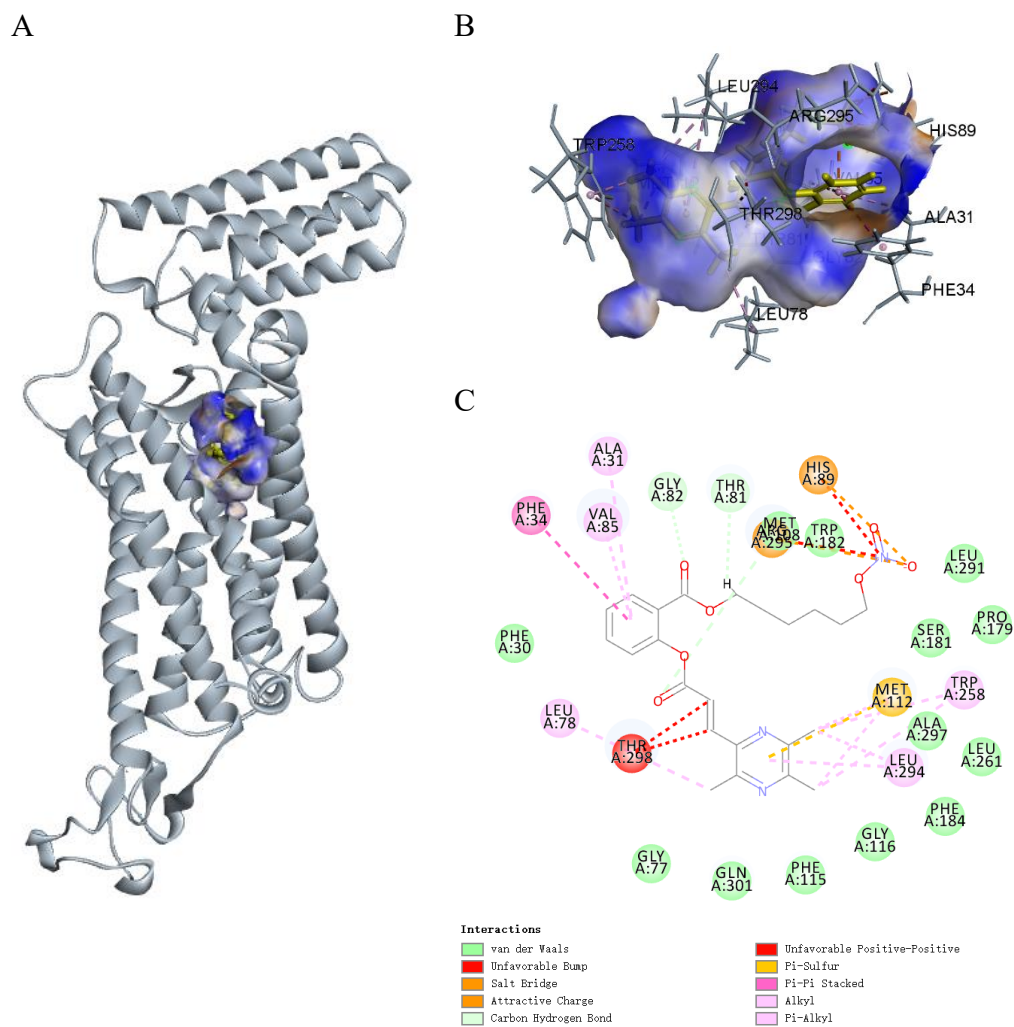

Figure S7. Possible binding mode of **14e** at active site of TBXA2R.

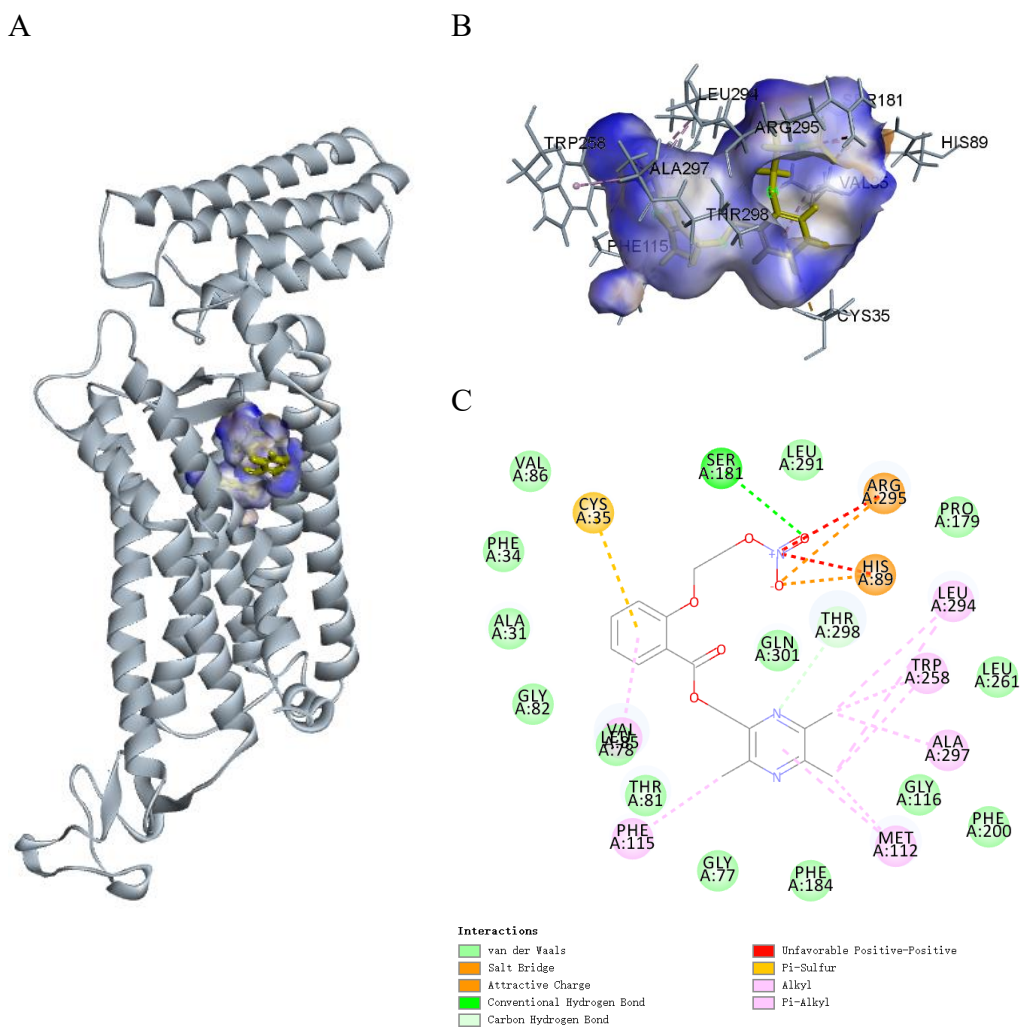

Figure S8. Possible binding mode of **15a** at active site of TBXA2R.

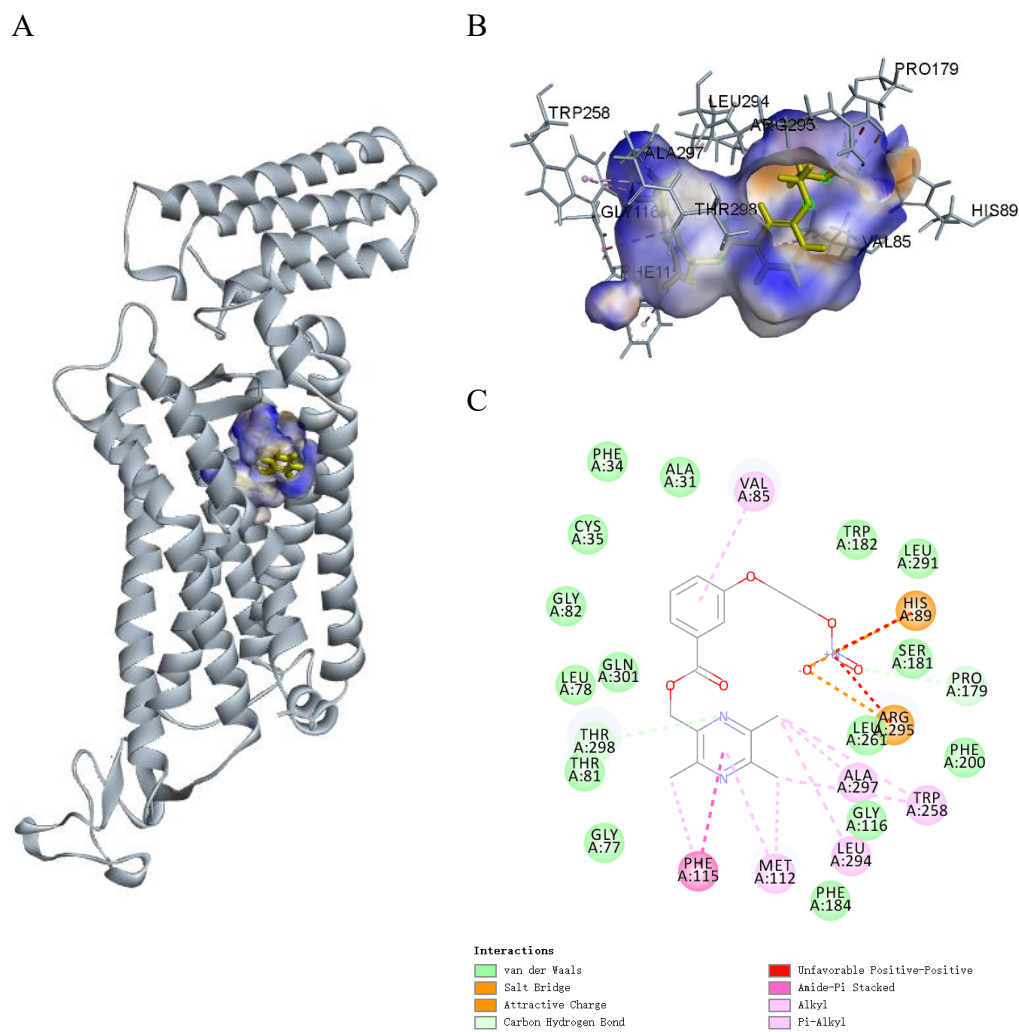

Figure S9. Possible binding mode of **15b** at active site of TBXA2R.

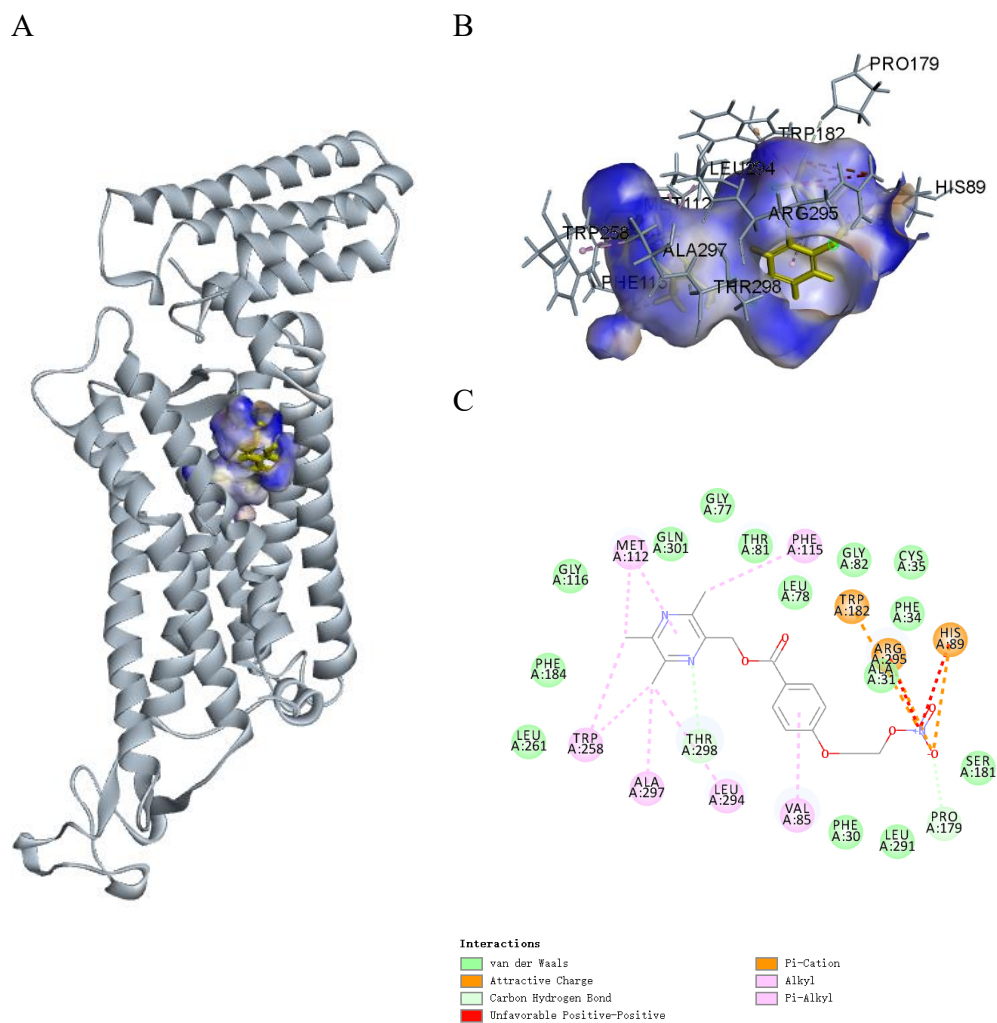

Figure S10. Possible binding mode of **15c** at active site of TBXA2R.



A

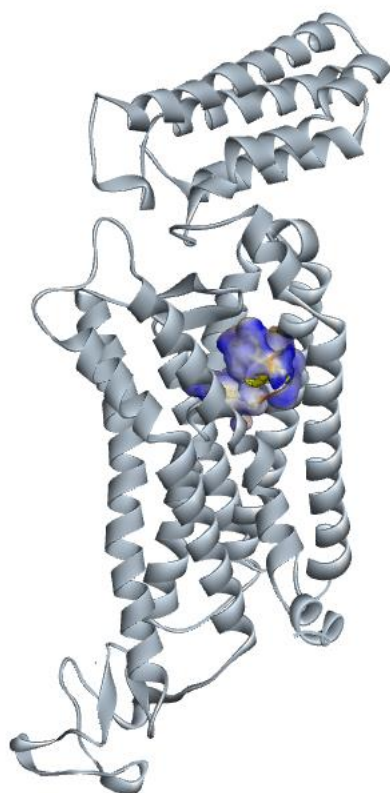

B

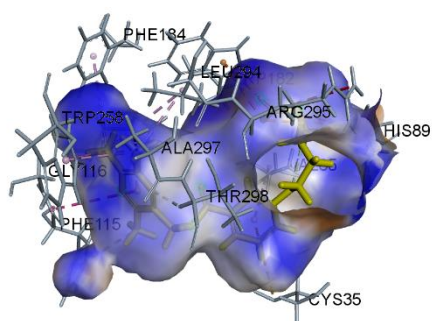

C

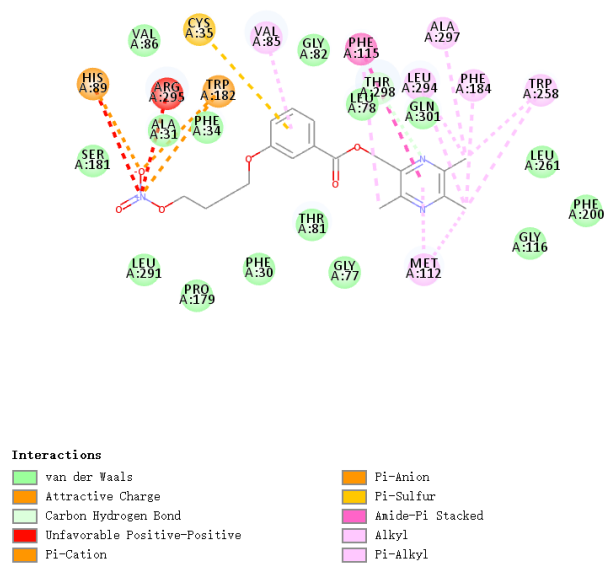

Figure S11. Possible binding mode of **15d** at active site of TBXA2R.

A

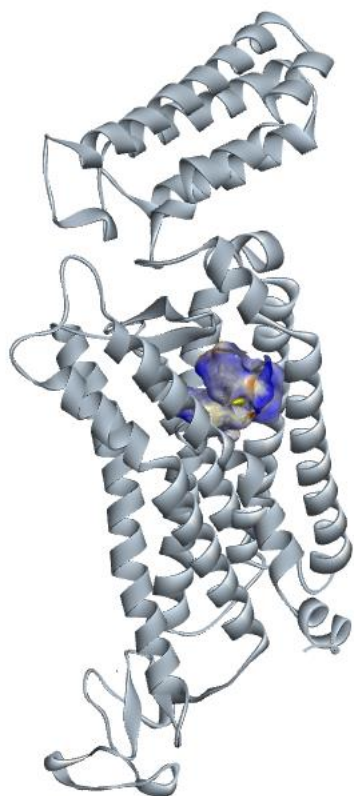

B

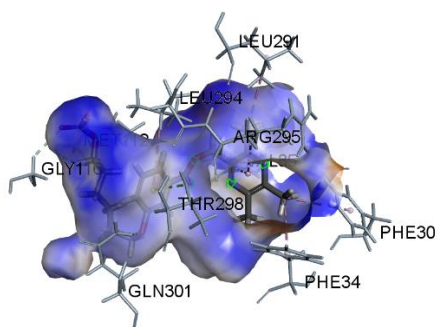

C

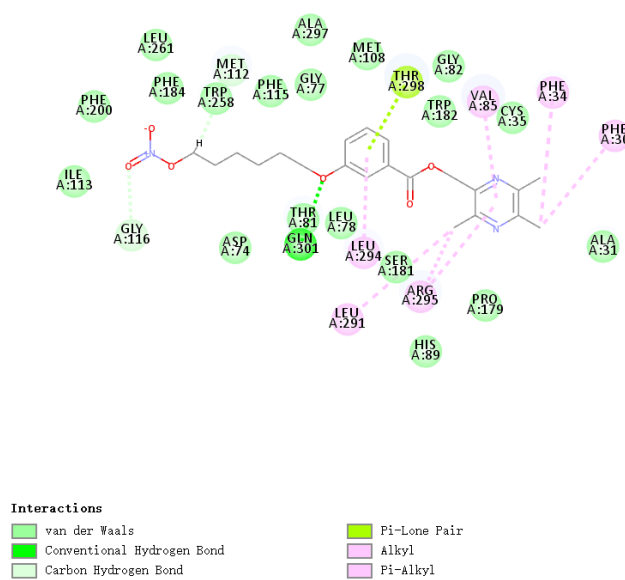

Figure S12. Possible binding mode of **15e** at active site of TBXA2R.



## NMR spectra of all new compounds

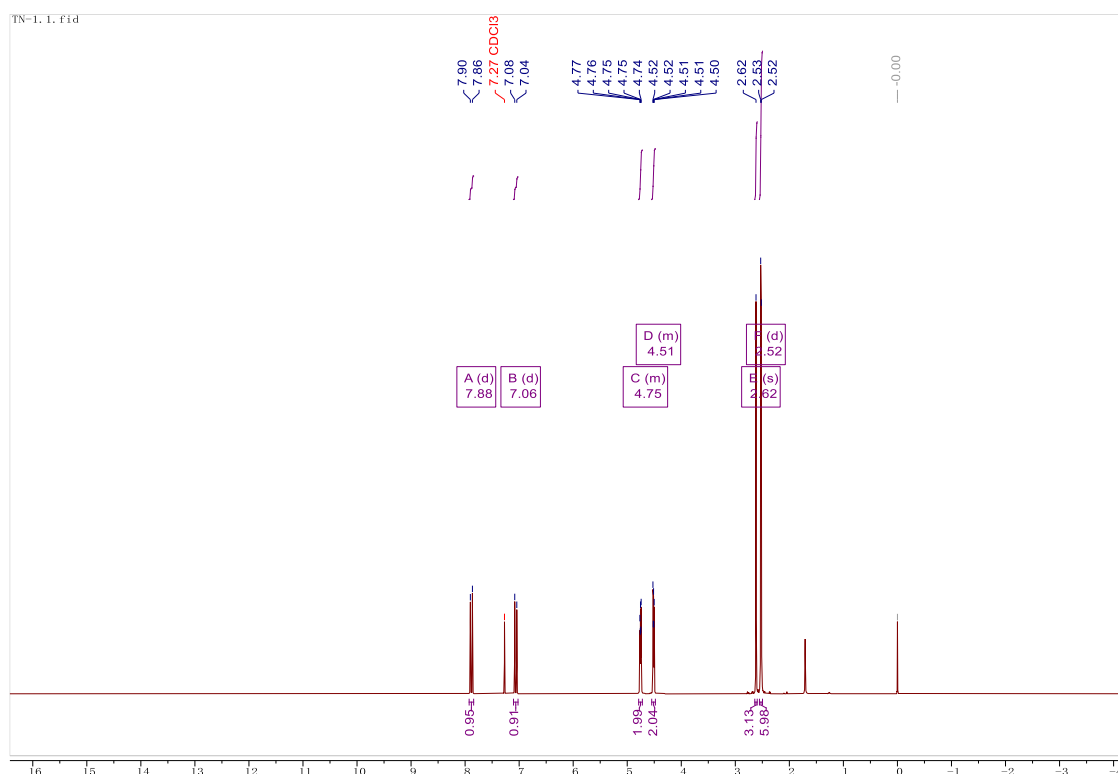

Figure S13.  $^1\text{H}$  NMR spectrum of 2-(nitrooxy)ethyl (E)-3-(3,5,6-trimethylpyrazin-2-yl)acrylate (**13**)

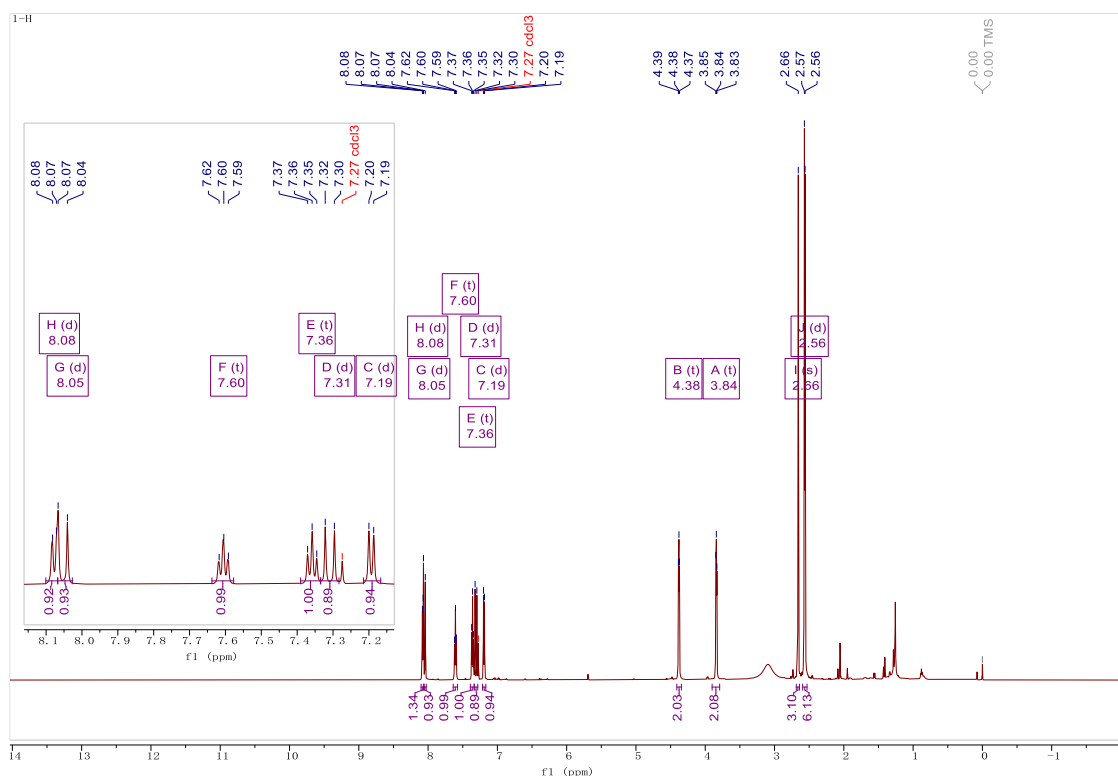

Figure S14.  $^1\text{H}$  NMR spectrum of 2-(nitrooxy)ethyl (E)-2-((3-(3,5,6-trimethylpyrazin-2-yl)acryloyl)oxy)benzoate (**14a**)

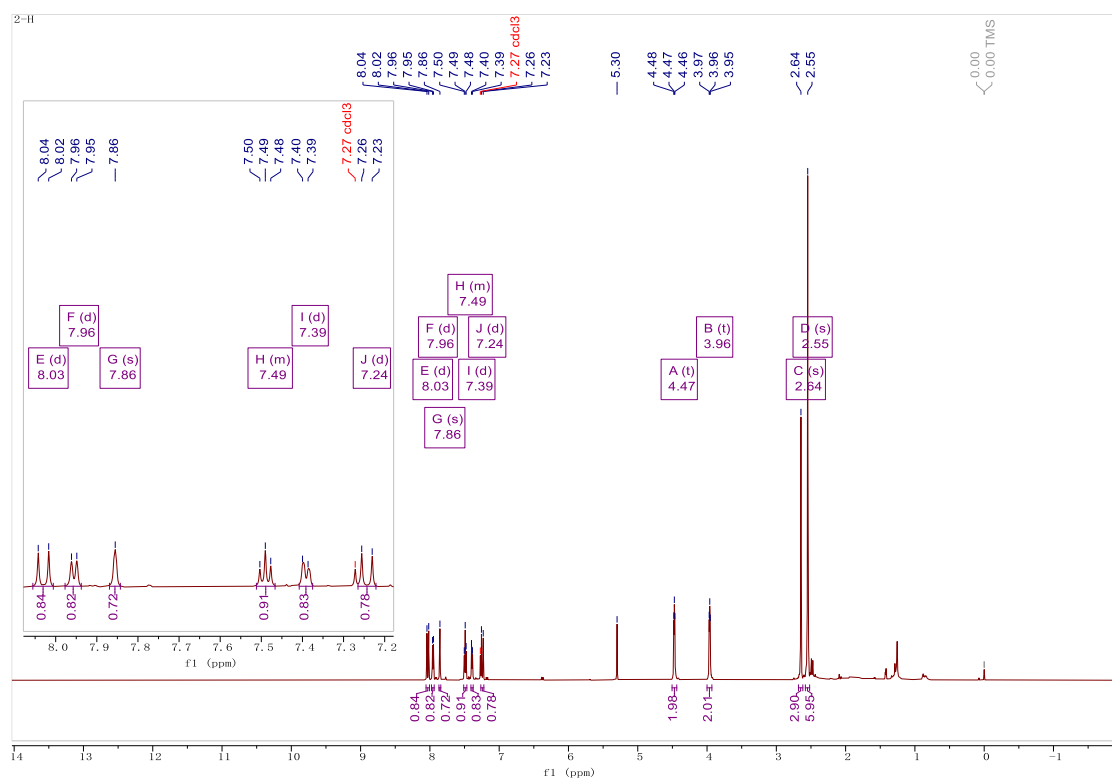

Figure S15.  $^1\text{H}$  NMR spectrum of 2-(nitrooxy)ethyl (E)-3-((3-(3,5,6-trimethylpyrazin-2-yl)acryloyl)oxy)benzoate (**14b**)

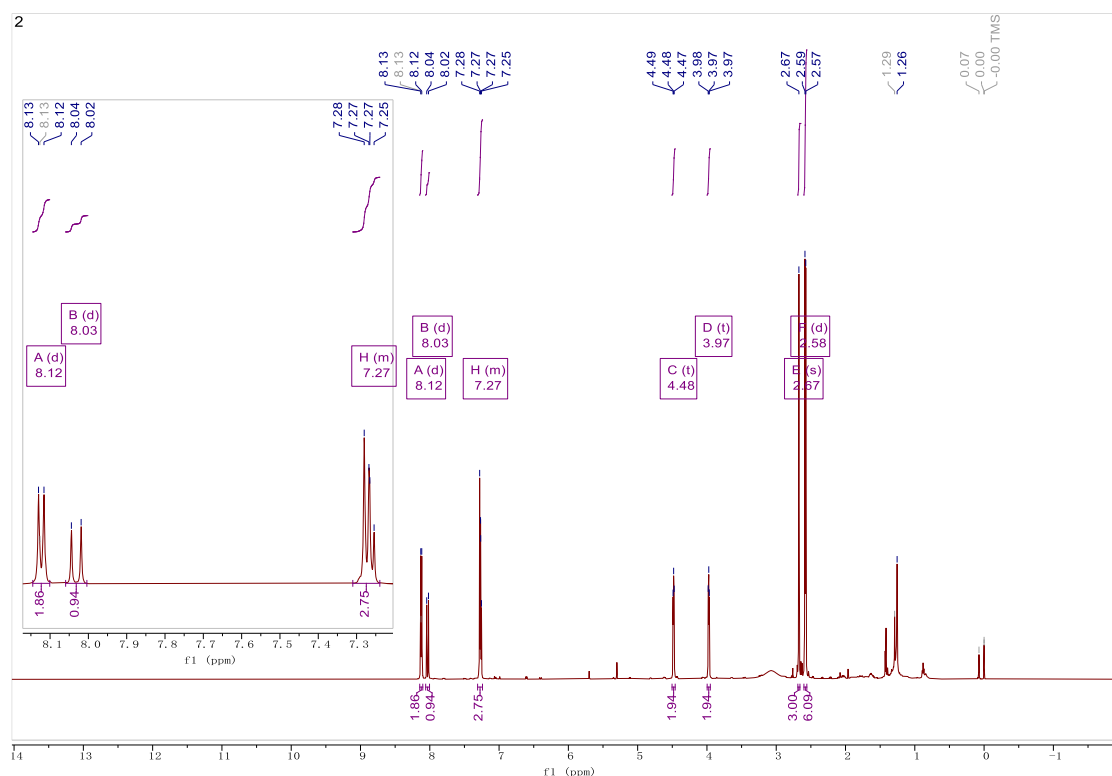

Figure S16.  $^1\text{H}$  NMR spectrum of 2-(nitrooxy)ethyl (E)-4-((3-(3,5,6-trimethylpyrazin-2-yl)acryloyl)oxy)benzoate (**14c**)

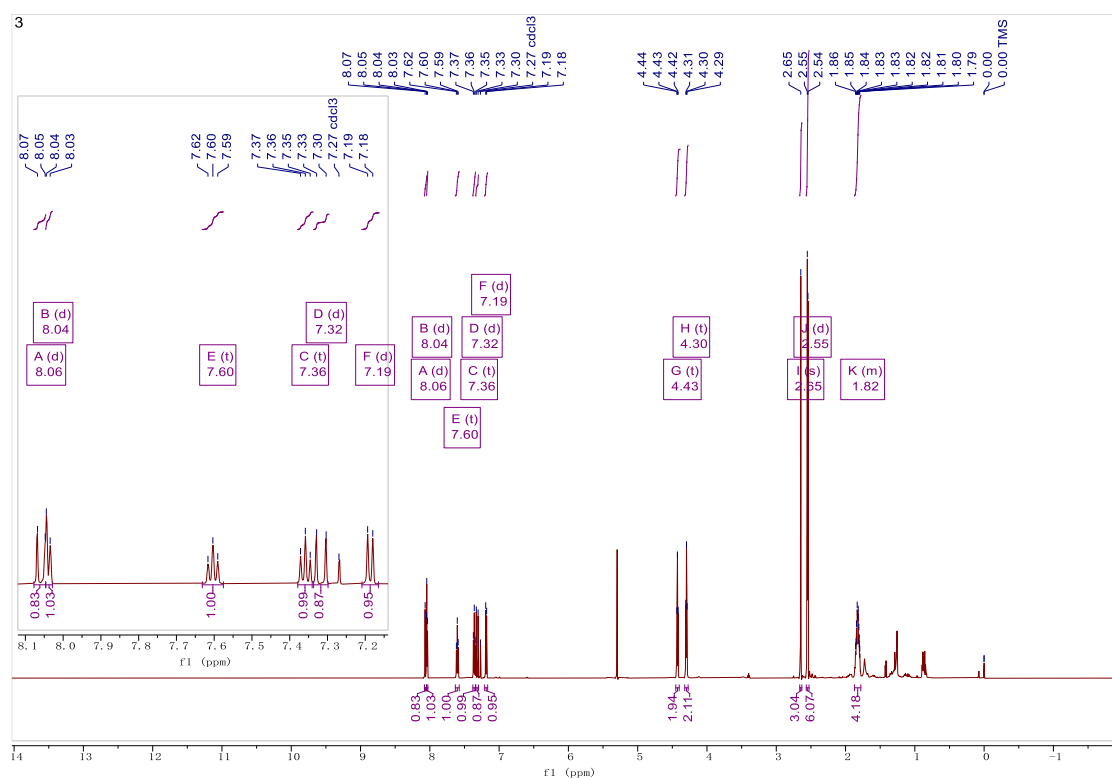

Figure S17. <sup>1</sup>H NMR spectrum of 4-(nitrooxy)butyl (E)-2-((3-(3,5,6-trimethylpyrazin-2-yl)acryloyl)oxy)benzoate (14d)

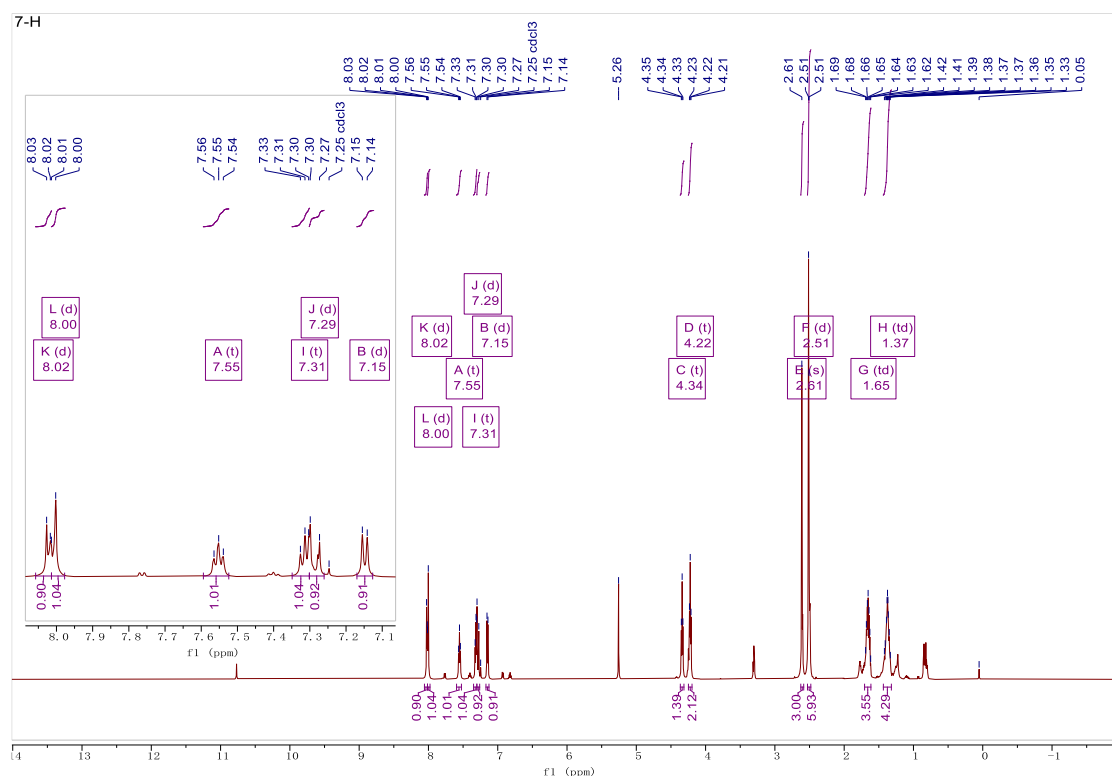

Figure S18. <sup>1</sup>H NMR spectrum of 6-(nitrooxy)hexyl (E)-2-((3-(3,5,6-trimethylpyrazin-2-yl)acryloyl)oxy)benzoate (14e)

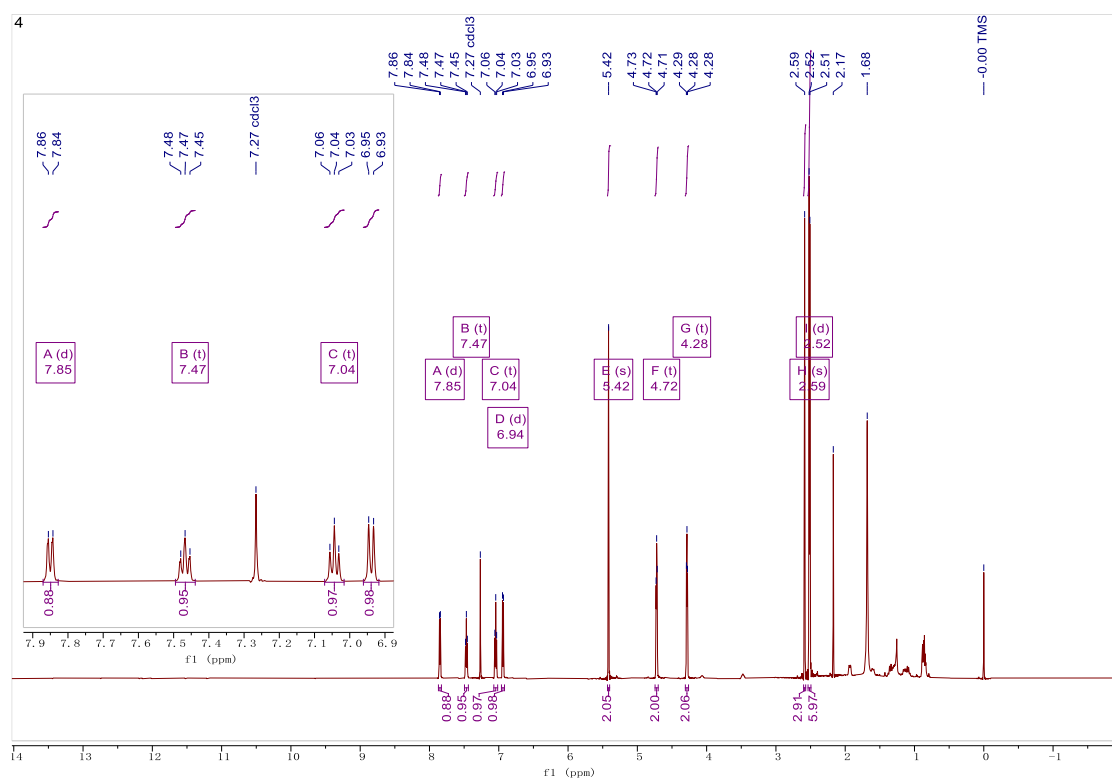

Figure S19.  $^1\text{H}$  NMR spectrum of (3,5,6-trimethylpyrazin-2-yl)methyl 2-(2-nitrooxy)ethoxybenzoate (**15a**)

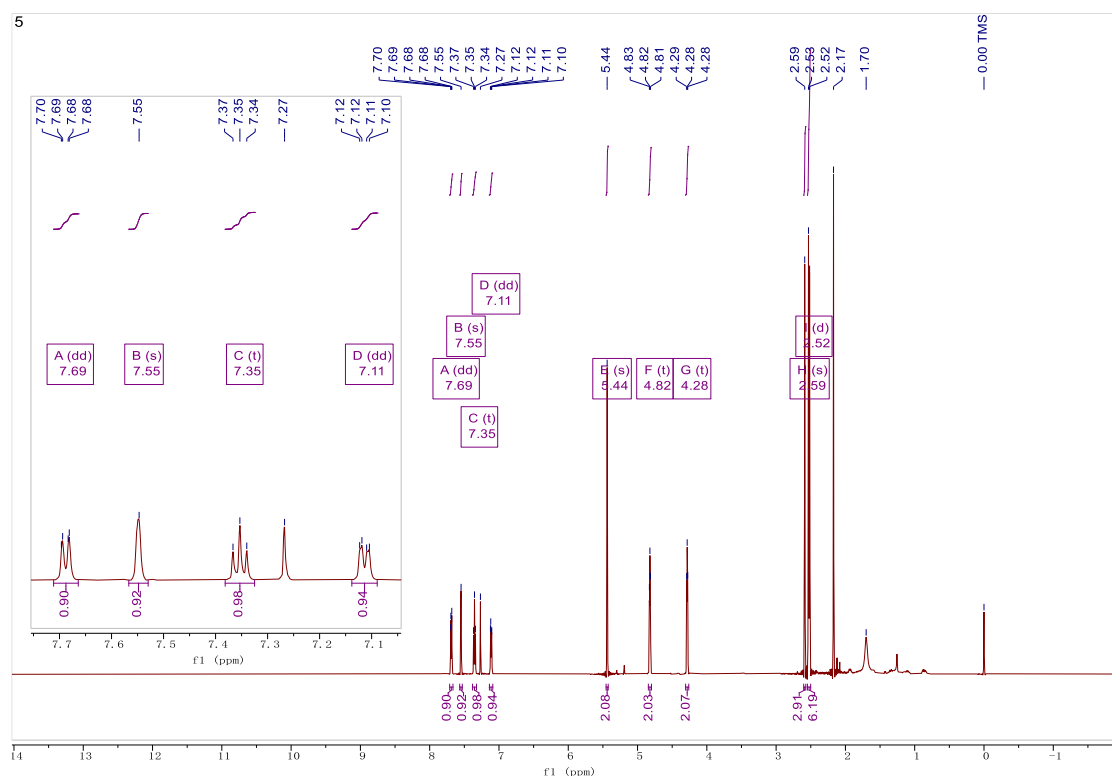

Figure S20.  $^1\text{H}$  NMR spectrum of (3,5,6-trimethylpyrazin-2-yl)methyl 3-(2-nitrooxy)ethoxybenzoate (**15b**)

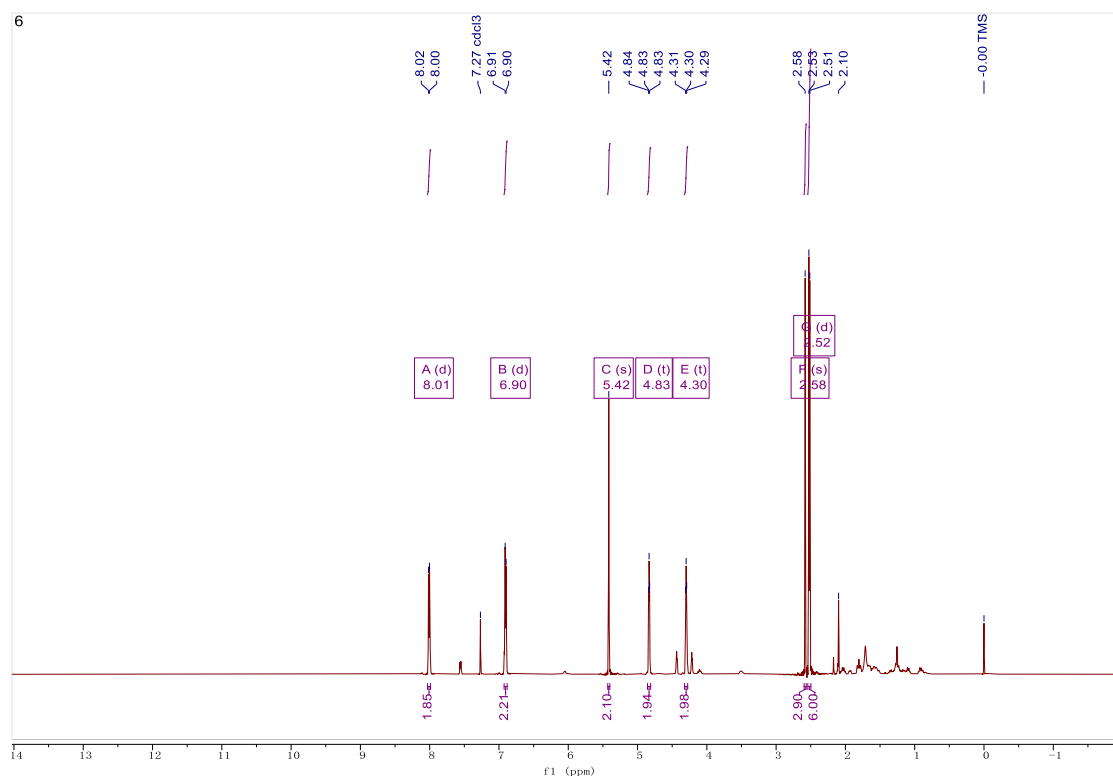

Figure S21.  $^1\text{H}$  NMR spectrum of (3,5,6-trimethylpyrazin-2-yl)methyl 4-(2-nitrooxy)ethoxybenzoate (**15c**)

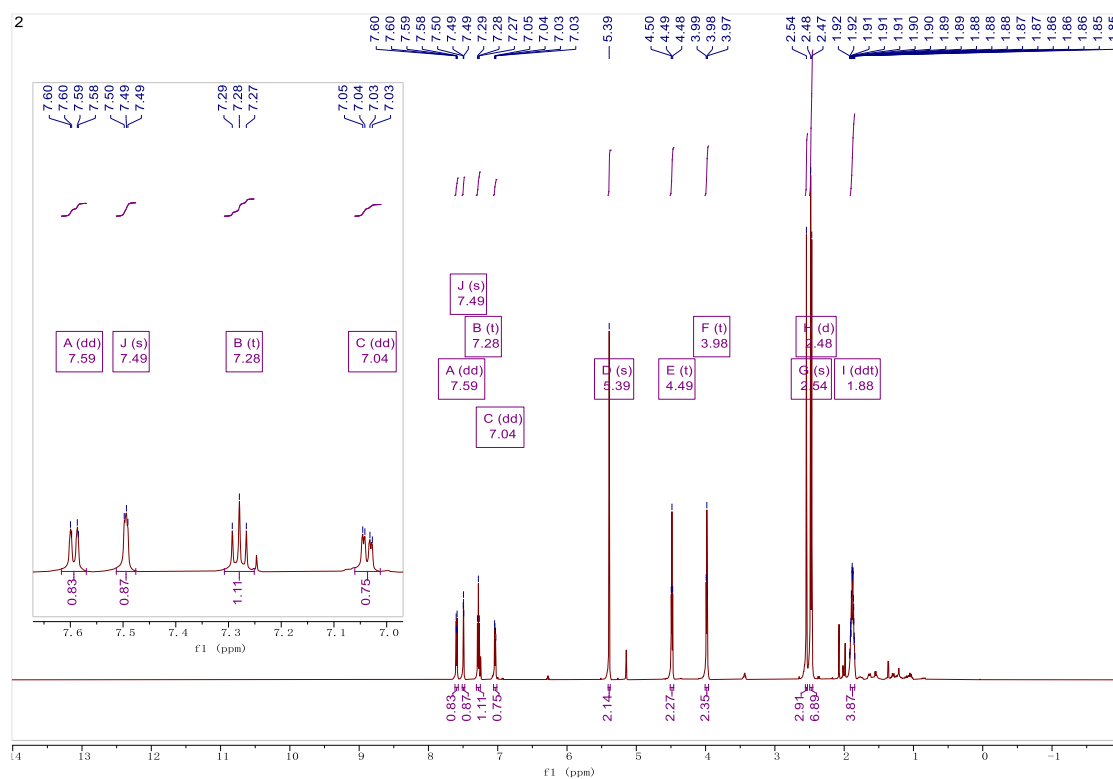

Figure S22.  $^1\text{H}$  NMR spectrum of (3,5,6-trimethylpyrazin-2-yl)methyl 3-(4-nitrooxy)butoxybenzoate (**15d**)

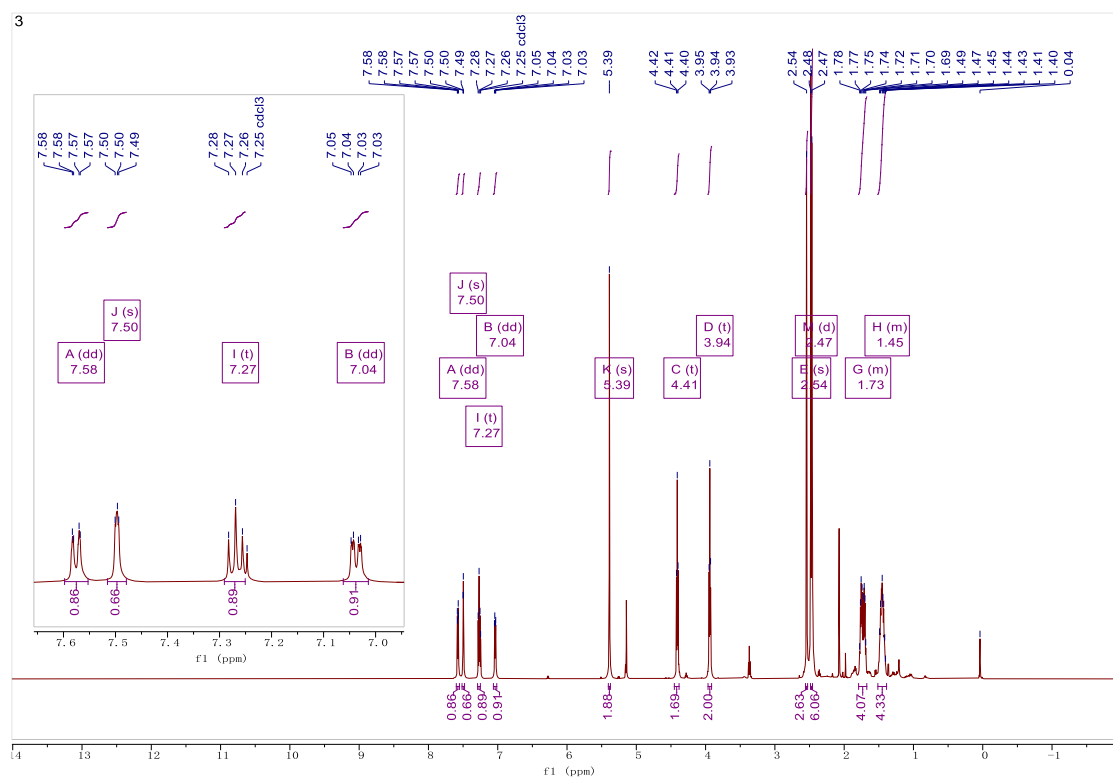

Figure S23. <sup>1</sup>H NMR spectrum of (3,5,6-trimethylpyrazin-2-yl)methyl 3-((6-(nitroxy)hexyl)oxy)benzoate (**15e**)

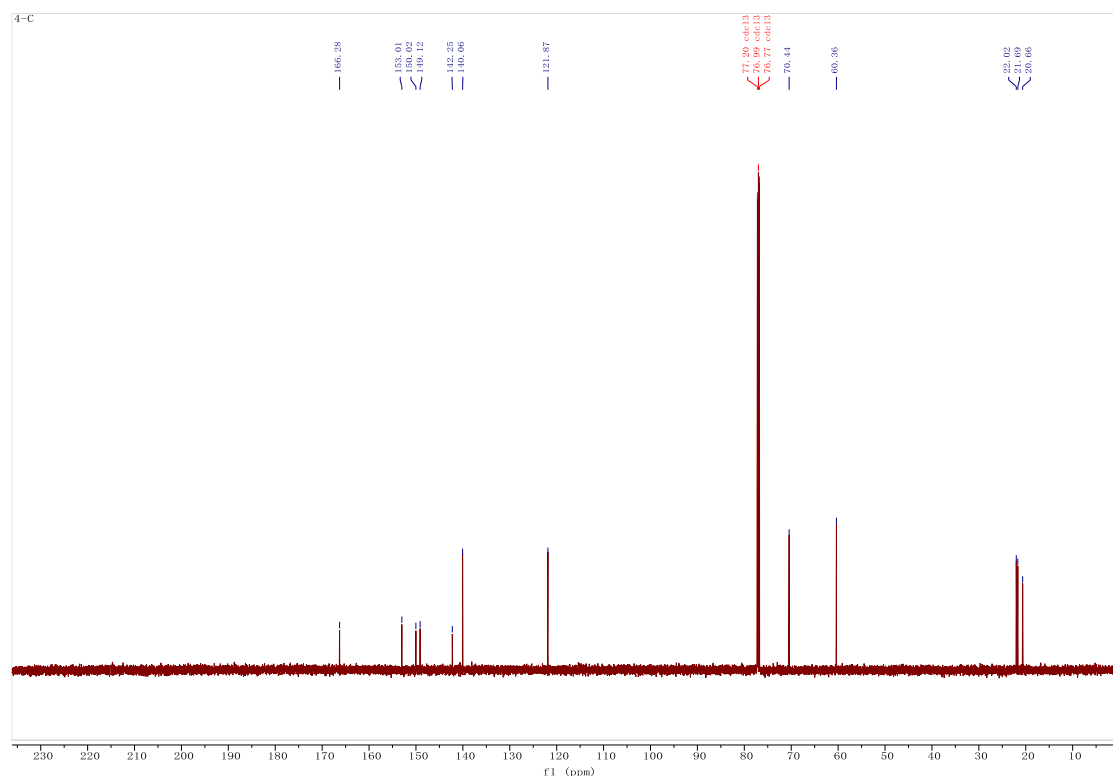

Figure S24. <sup>13</sup>C NMR spectrum of 2-(nitrooxy)ethyl (E)-3-(3,5,6-trimethylpyrazin-2-yl)acrylate (**13**)

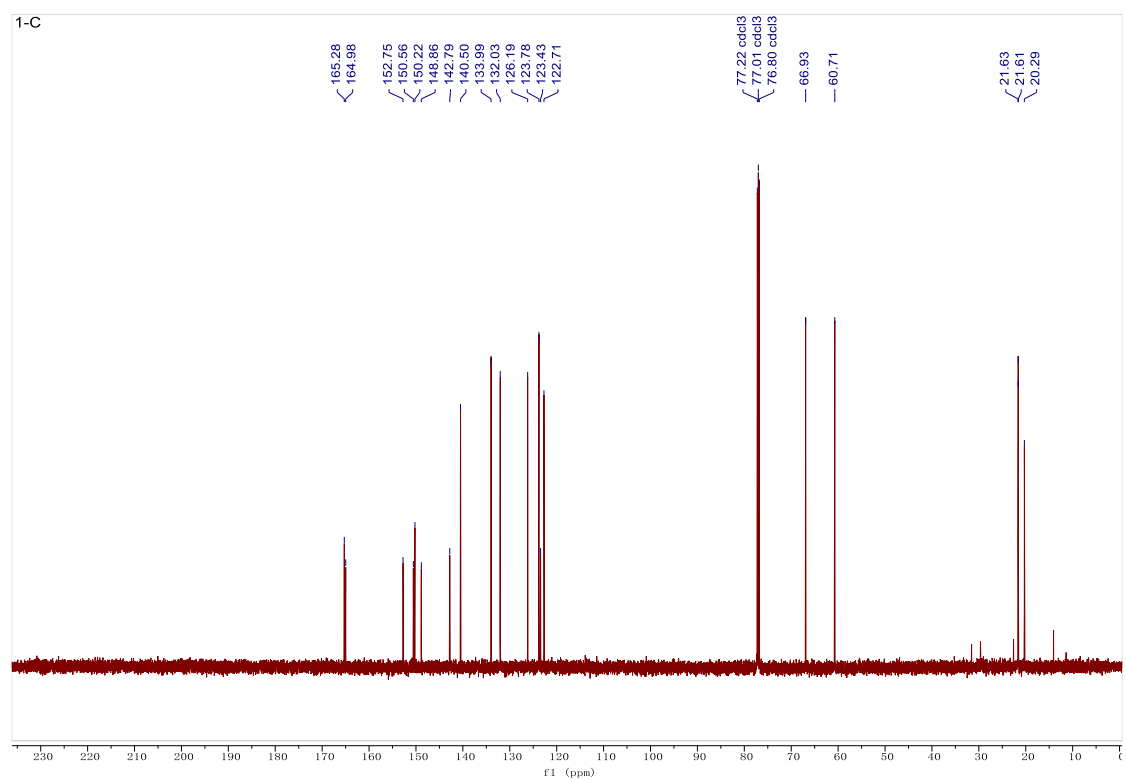

Figure S25.  $^{13}\text{C}$  NMR spectrum of 2-(nitroxy)ethyl (E)-2-((3-(3,5,6-trimethylpyrazin-2-yl)acryloyl)oxy)benzoate (**14a**)

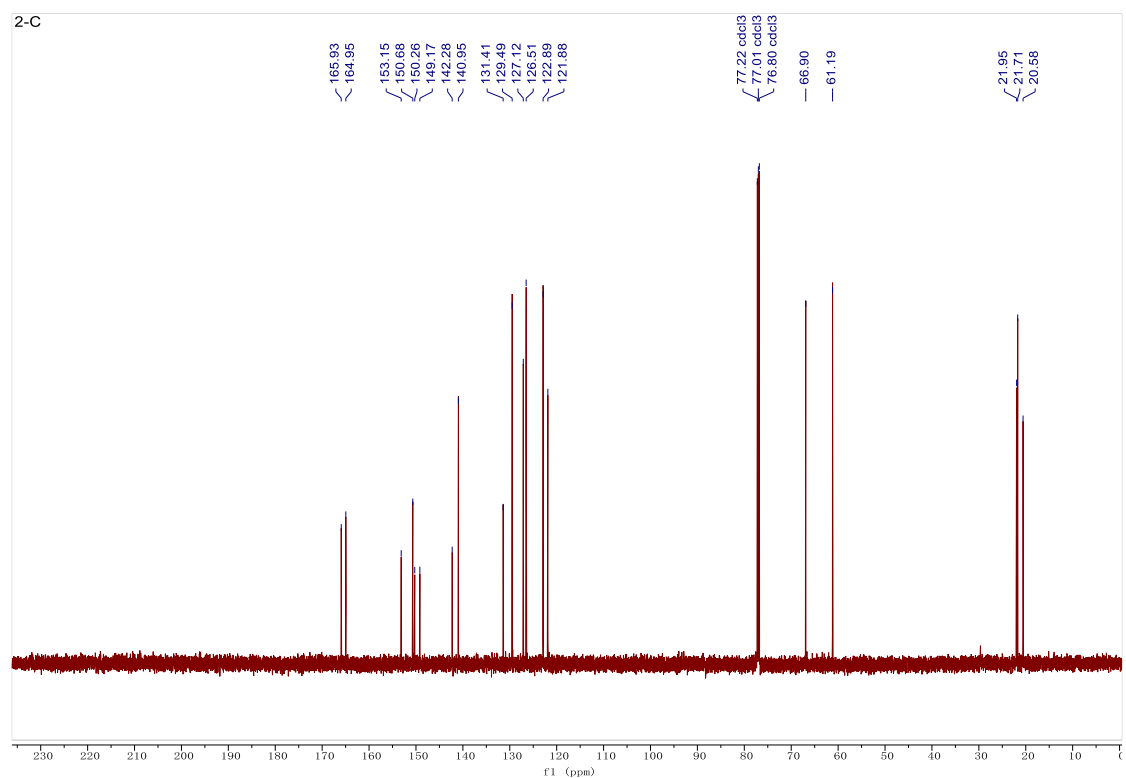

Figure S26.  $^{13}\text{C}$  NMR spectrum of 2-(nitroxy)ethyl (E)-3-((3-(3,5,6-trimethylpyrazin-2-yl)acryloyl)oxy)benzoate (**14b**)

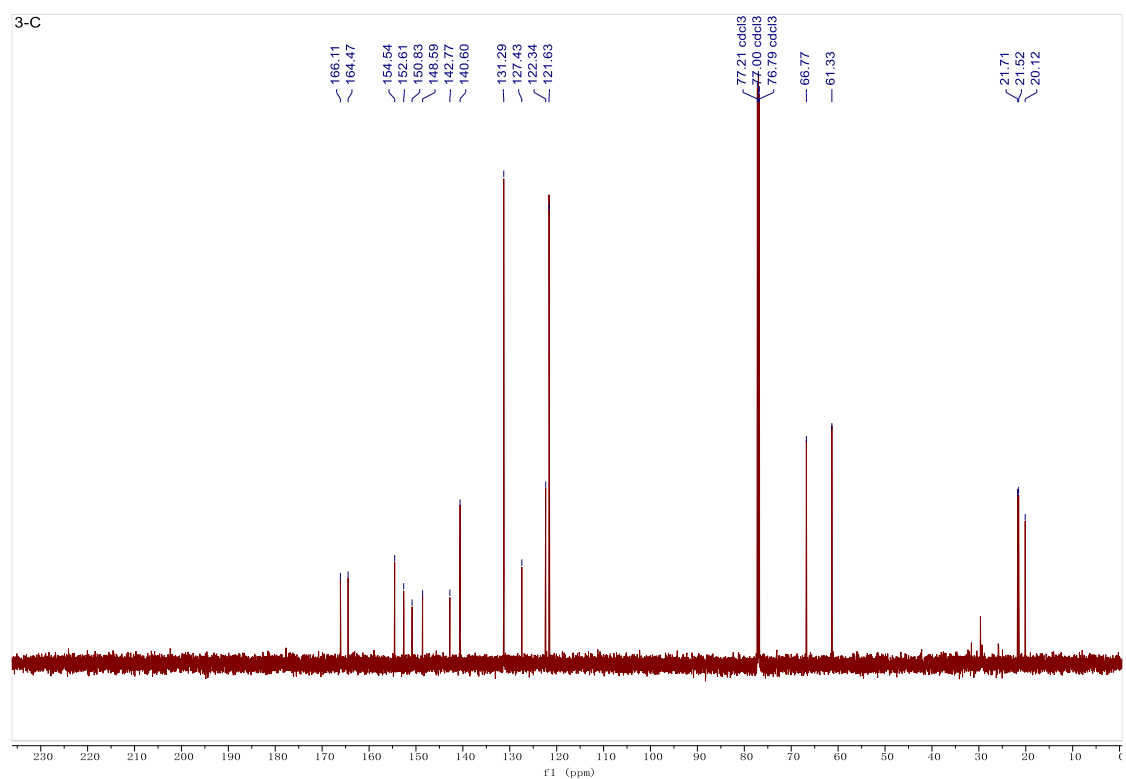

Figure S27.  $^{13}\text{C}$  NMR spectrum of 2-(nitrooxy)ethyl (E)-4-((3-(3,5,6-trimethylpyrazin-2-yl)acryloyl)oxy)benzoate (**14c**)

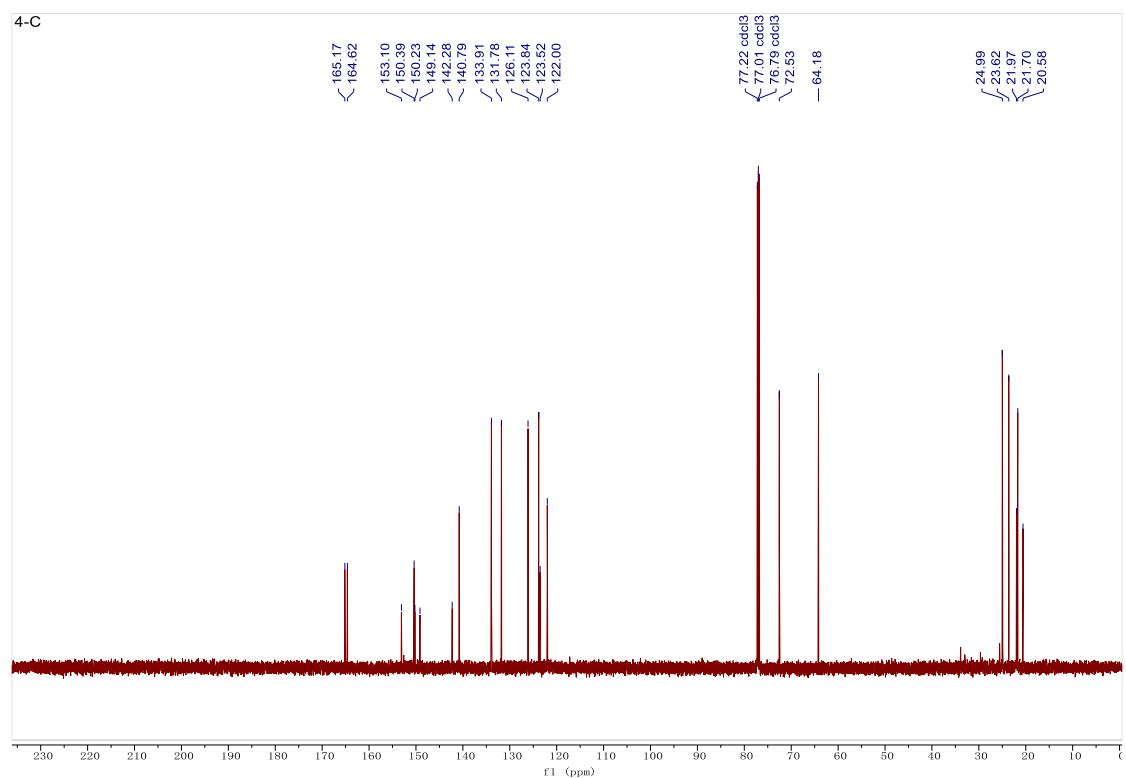

Figure S28.  $^{13}\text{C}$  NMR spectrum of 4-(nitrooxy)butyl (E)-2-((3-(3,5,6-trimethylpyrazin-2-yl)acryloyl)oxy)benzoate (**14d**)



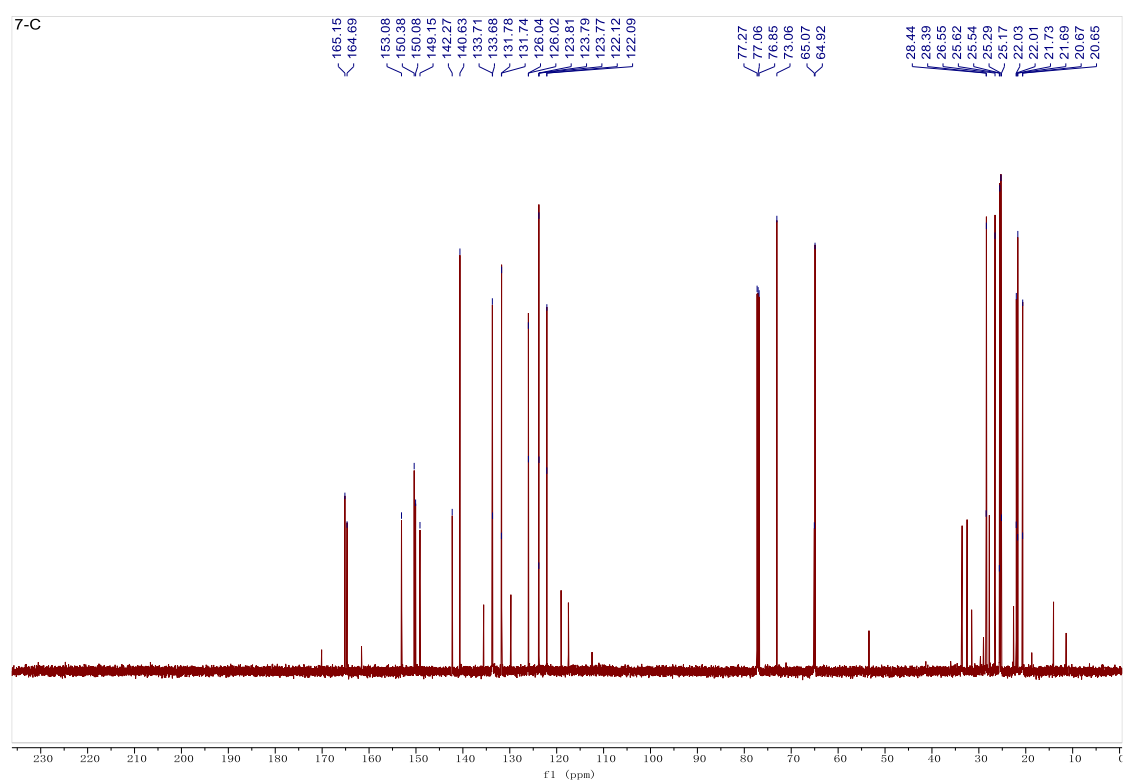

Figure S29.  $^{13}\text{C}$  NMR spectrum of 6-(nitrooxy)hexyl (E)-2-((3-(3,5,6-trimethylpyrazin-2-yl)acryloyl)oxy)benzoate (**14e**)

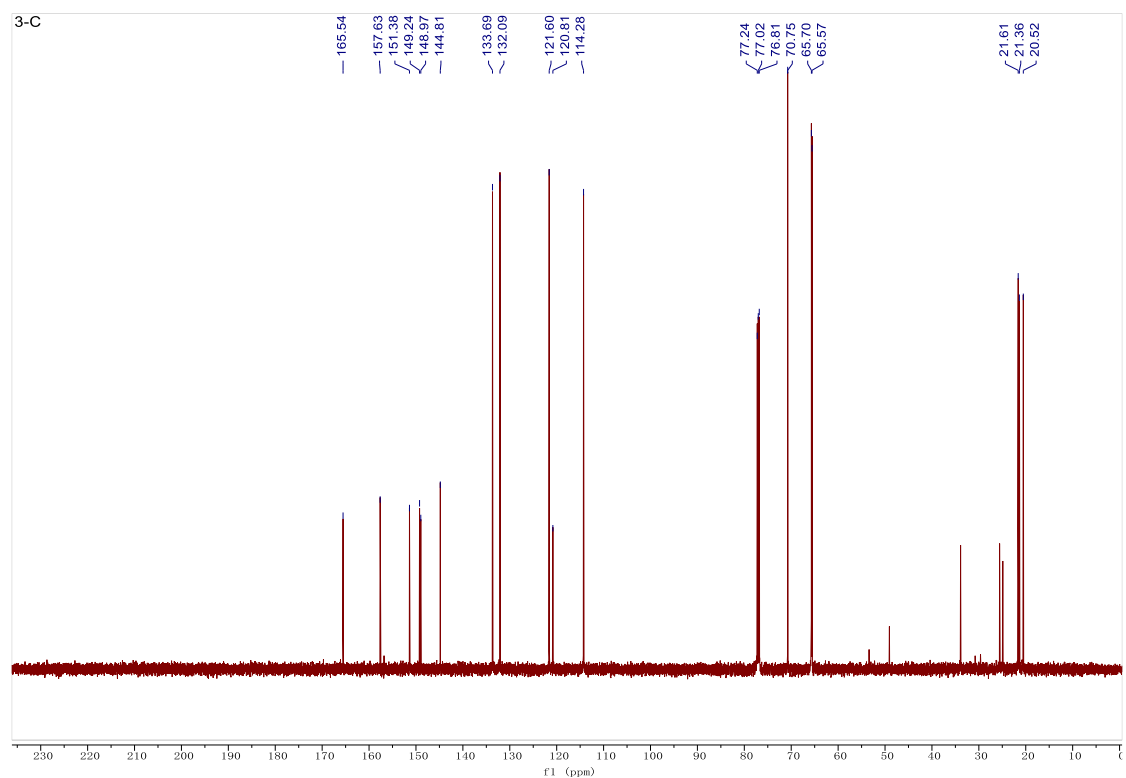

Figure S30.  $^{13}\text{C}$  NMR spectrum of (3,5,6-trimethylpyrazin-2-yl)methyl 2-(2-(nitrooxy)ethoxy)benzoate (**15a**)

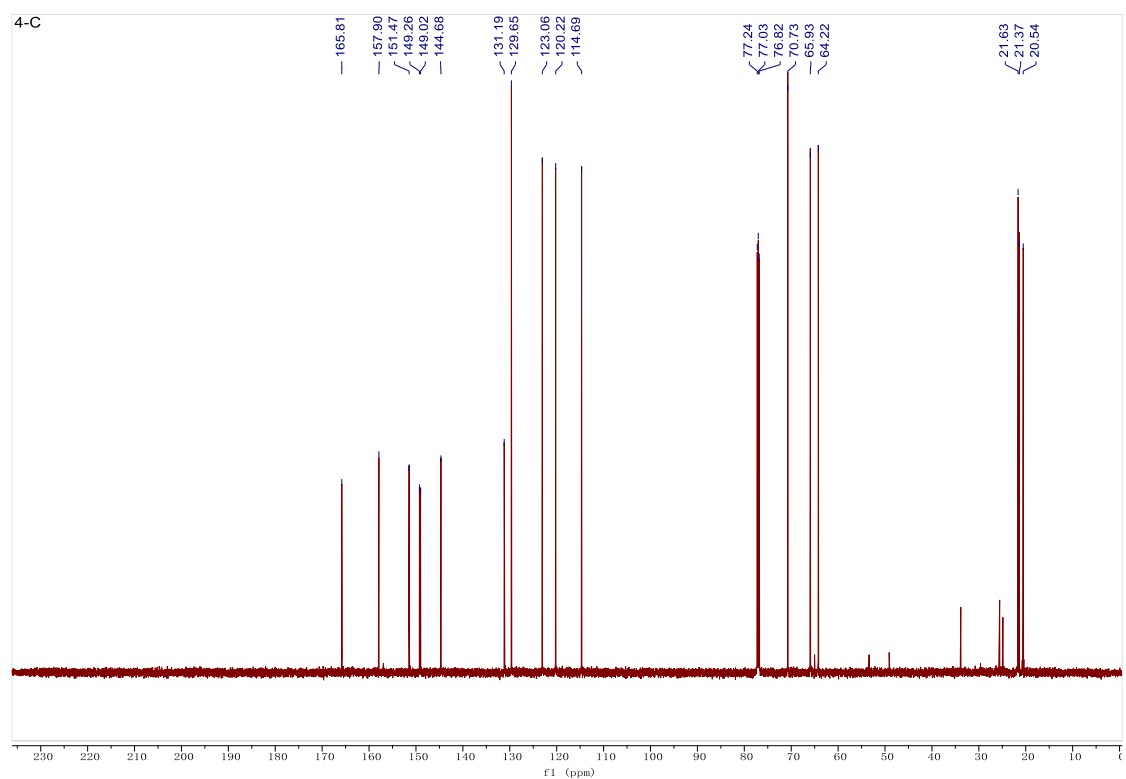

Figure S31.  $^{13}\text{C}$  NMR spectrum of (3,5,6-trimethylpyrazin-2-yl)methyl 3-(2-(nitrooxy)ethoxy)benzoate (**15b**)

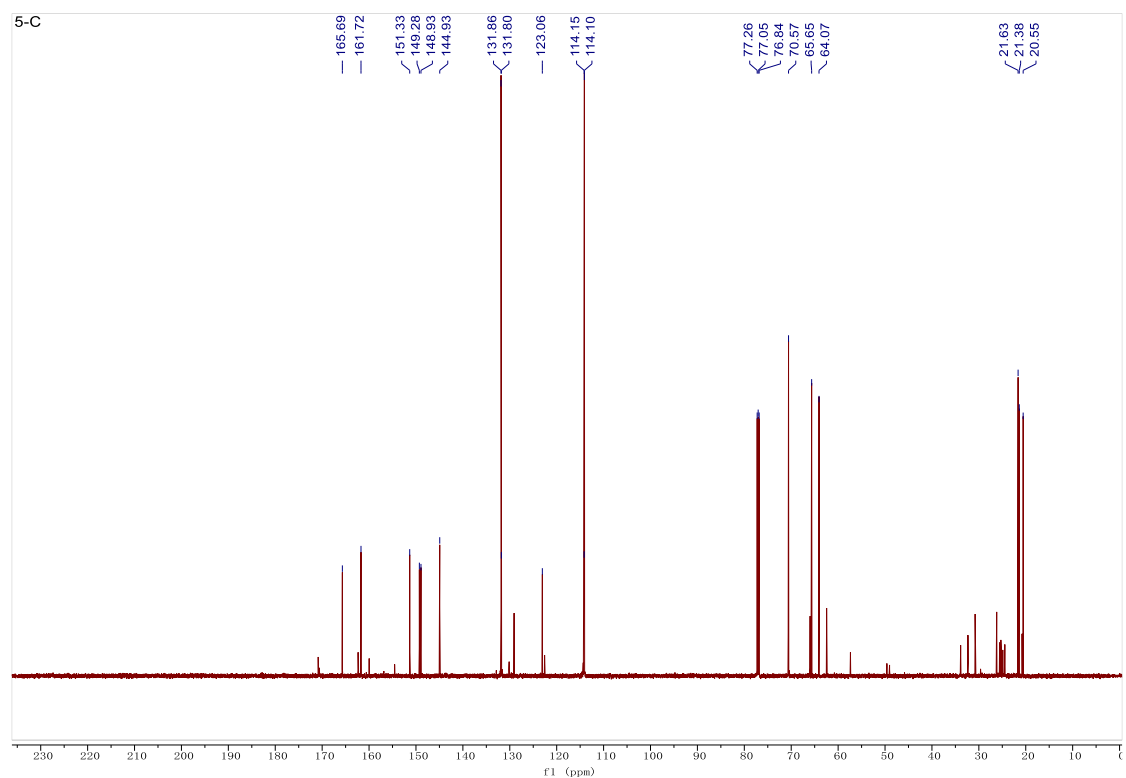

Figure S32.  $^{13}\text{C}$  NMR spectrum of (3,5,6-trimethylpyrazin-2-yl)methyl 4-(2-(nitrooxy)ethoxy)benzoate (**15c**)

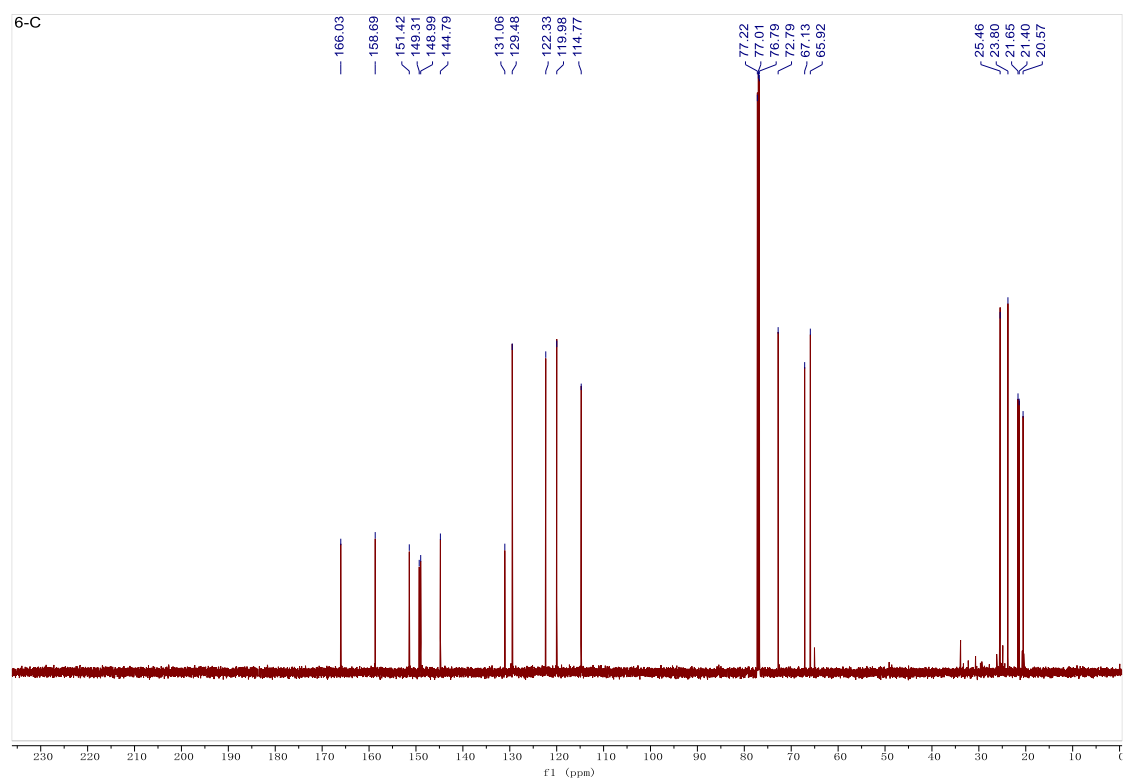

Figure S33.  $^{13}\text{C}$  NMR spectrum of (3,5,6-trimethylpyrazin-2-yl)methyl 3-(4-(nitrooxy)butoxy)benzoate (**15d**)

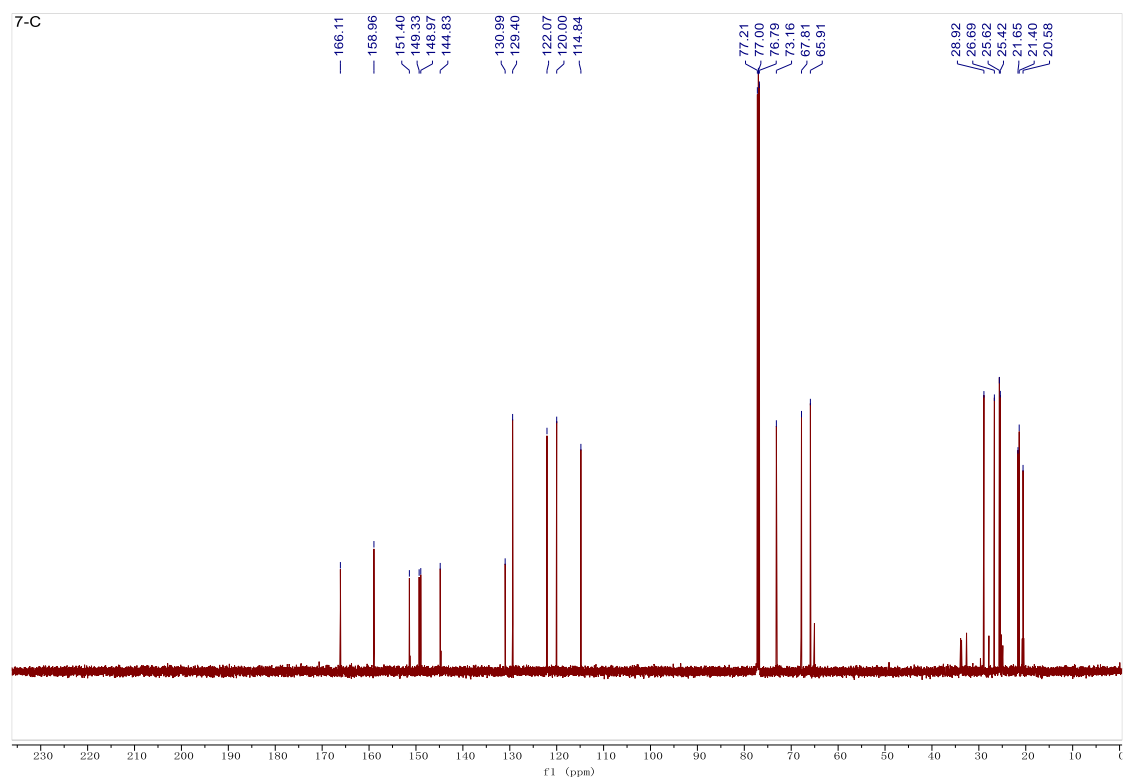

Figure S34.  $^{13}\text{C}$  NMR spectrum of (3,5,6-trimethylpyrazin-2-yl)methyl 3-((6-(nitrooxy)hexyl)oxy)benzoate (**15e**)

## HRMS spectra of all new compounds.

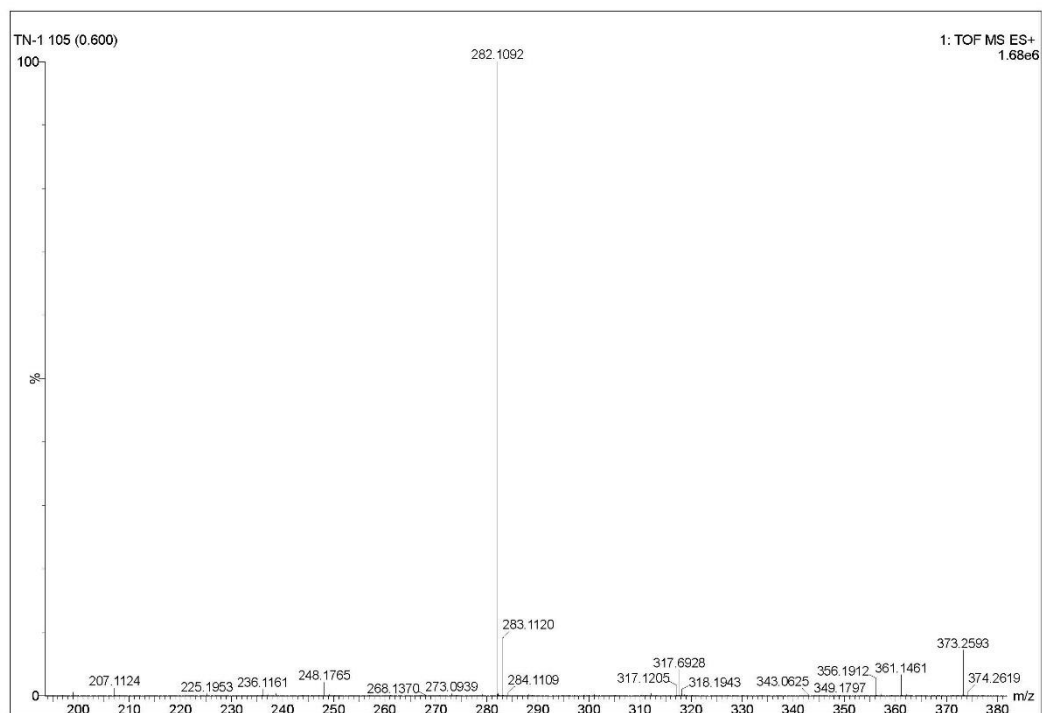

Figure S35. HRMS spectrum of 2-(nitrooxy)ethyl (E)-3-(3,5,6-trimethylpyrazin-2-yl)acrylate (**13**)

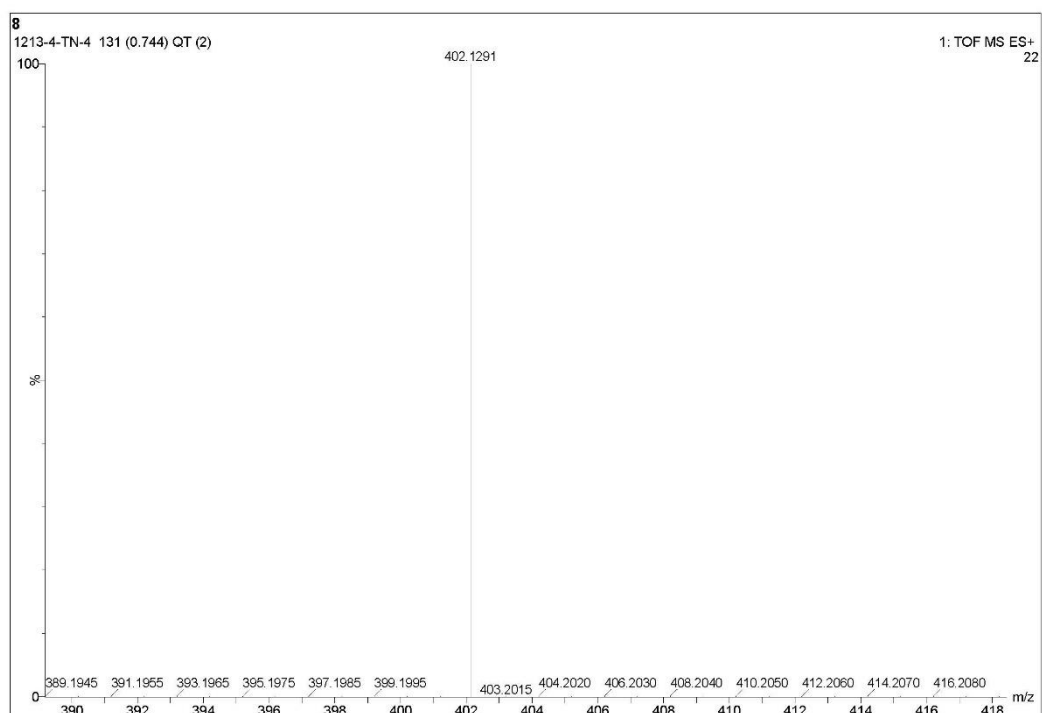

Figure S36. HRMS spectrum of 2-(nitrooxy)ethyl (E)-2-((3-(3,5,6-trimethylpyrazin-2-yl)acryloyl)oxy)benzoate (**14a**)

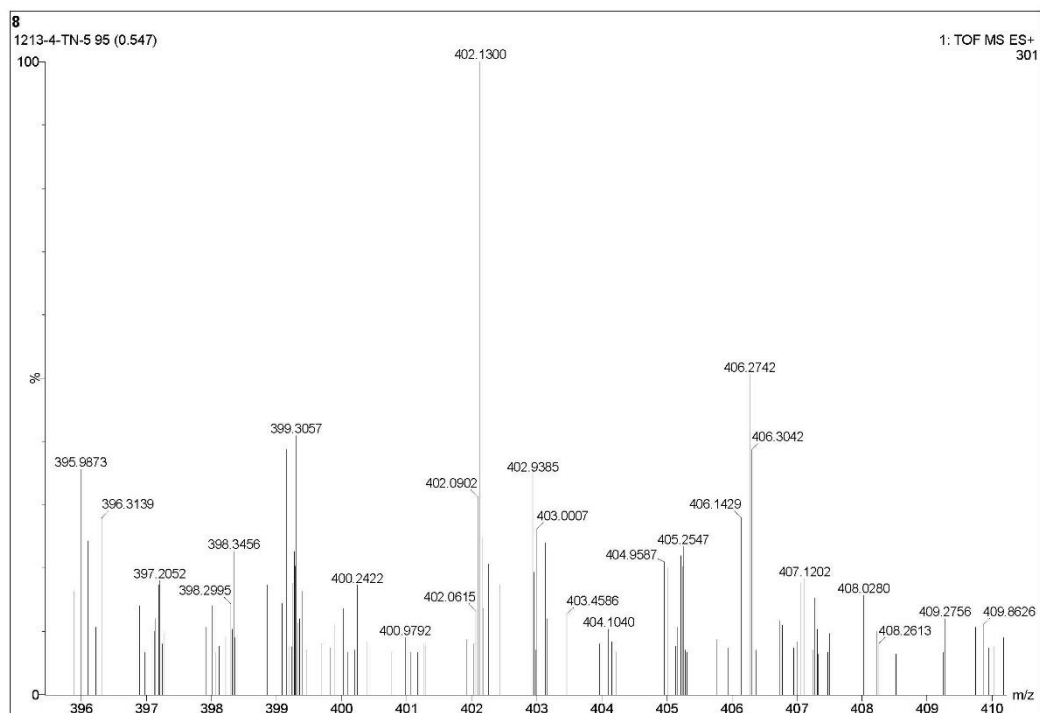

Figure S37. HRMS spectrum of 2-(nitrooxy)ethyl (E)-3-((3-(3,5,6-trimethylpyrazin-2-yl)acryloyl)oxy)benzoate (**14b**)

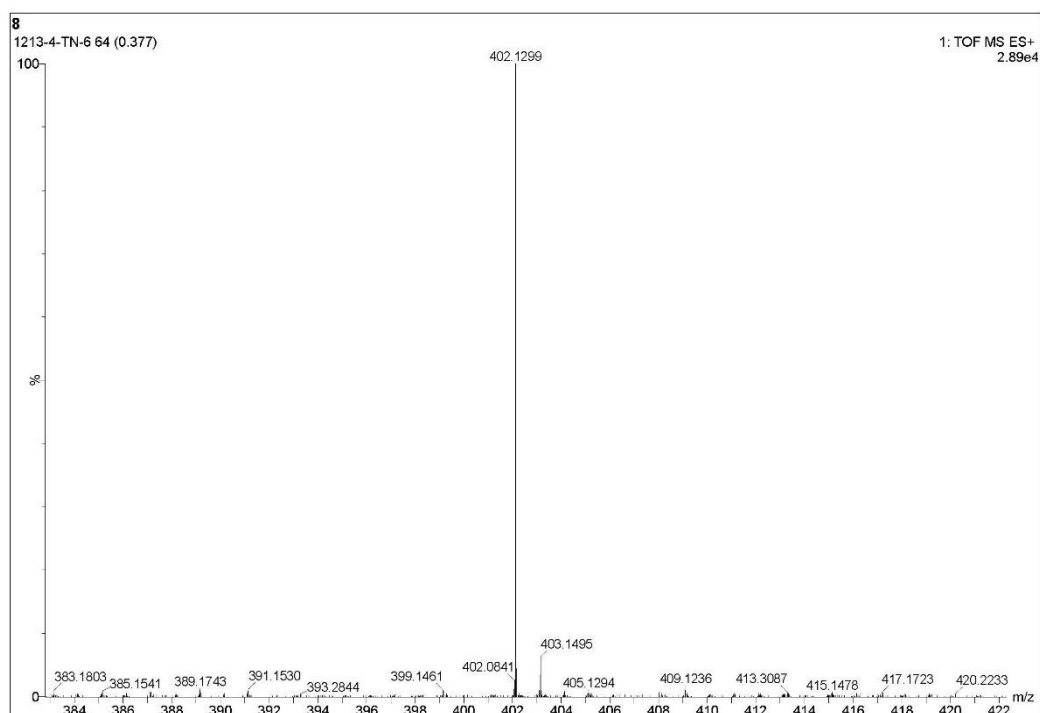

Figure S38. HRMS spectrum of 2-(nitrooxy)ethyl (E)-4-((3-(3,5,6-trimethylpyrazin-2-yl)acryloyl)oxy)benzoate (**14c**)

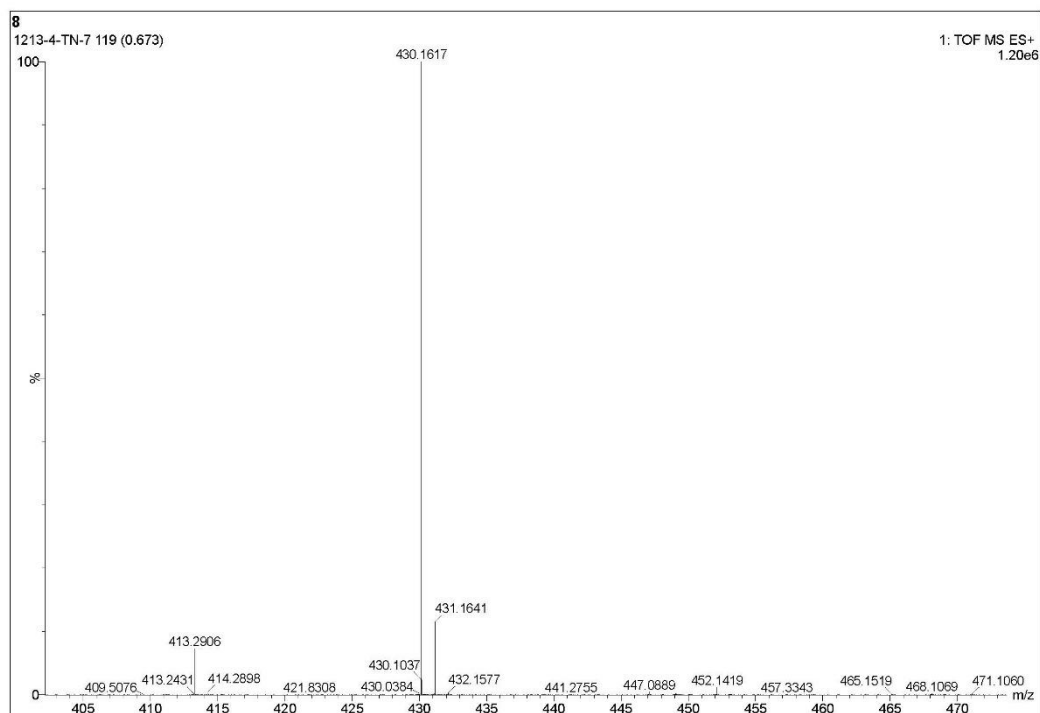

Figure S39. HRMS spectrum of 4-(nitrooxy)butyl (E)-2-((3-(3,5,6-trimethylpyrazin-2-yl)acryloyl)oxy)benzoate (**14d**)

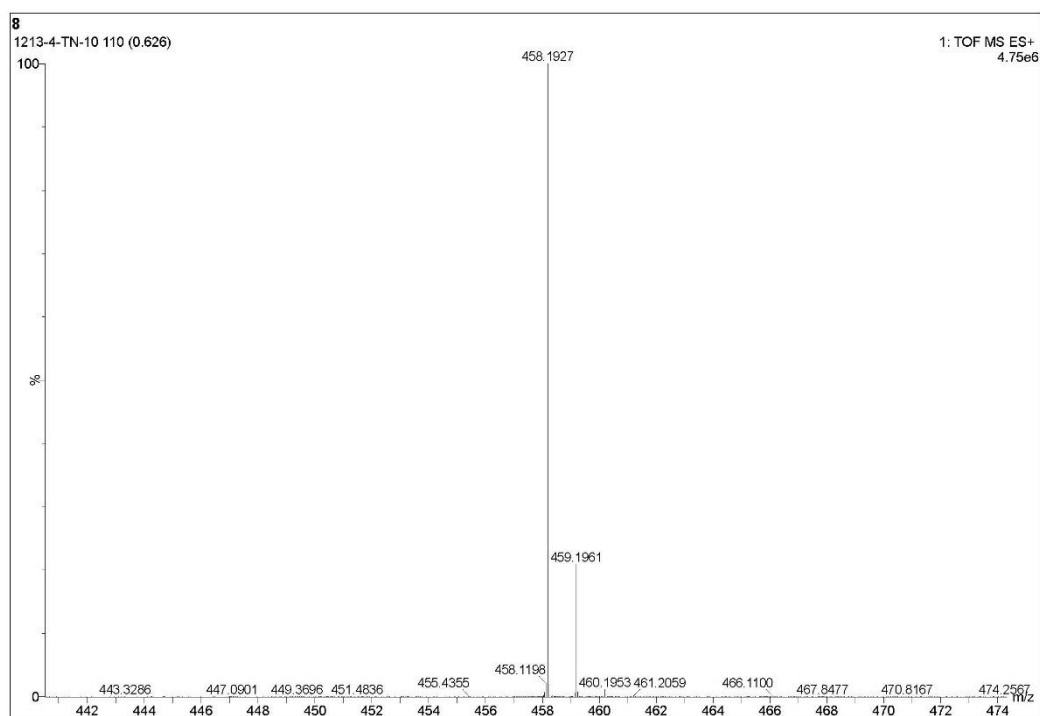

Figure S40. HRMS spectrum of 6-(nitrooxy)hexyl (E)-2-((3-(3,5,6-trimethylpyrazin-2-yl)acryloyl)oxy)benzoate (**14e**)

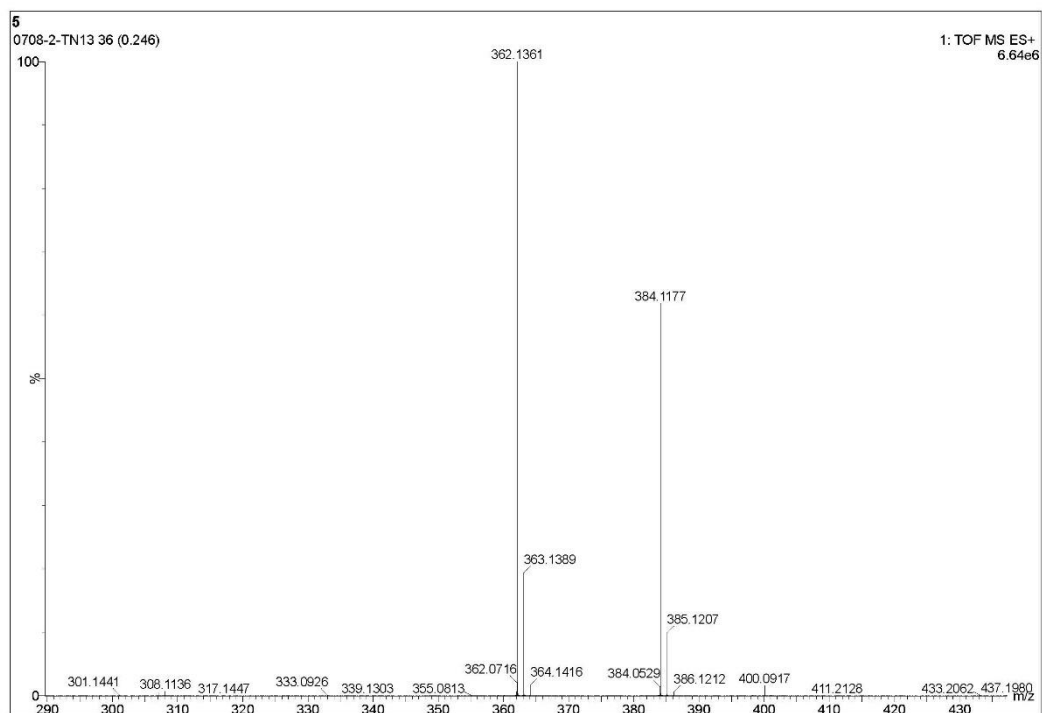

Figure S41. HRMS spectrum of (3,5,6-trimethylpyrazin-2-yl)methyl 2-(2-(nitrooxy)ethoxy)benzoate (**15a**)

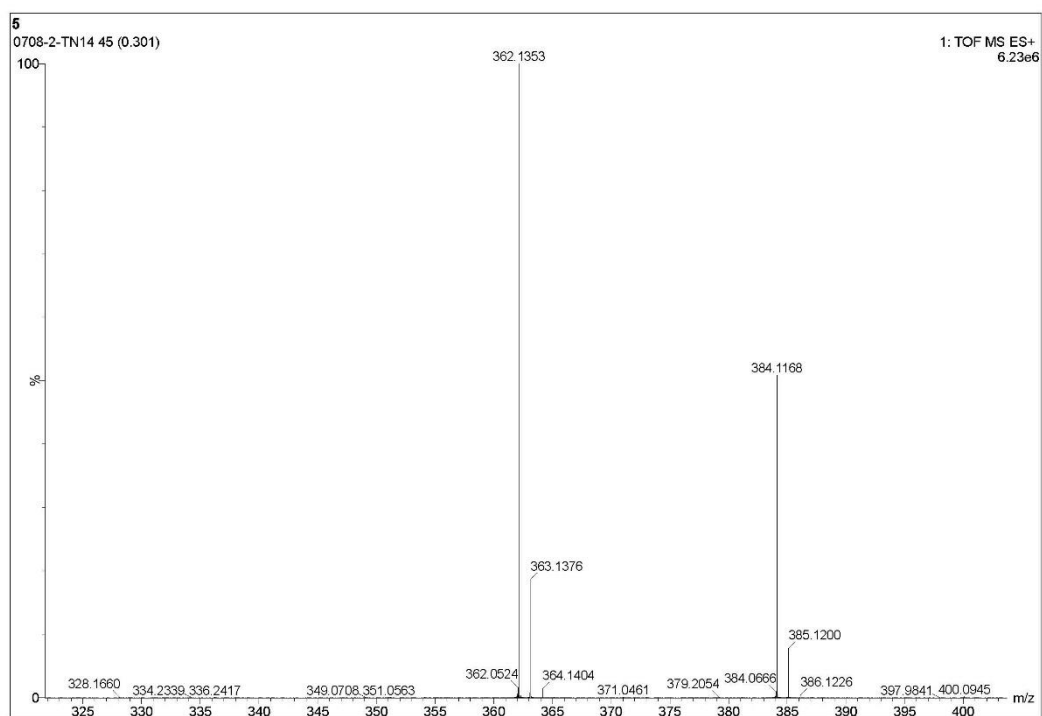

Figure S42. HRMS spectrum of (3,5,6-trimethylpyrazin-2-yl)methyl 3-(2-(nitrooxy)ethoxy)benzoate (**15b**)

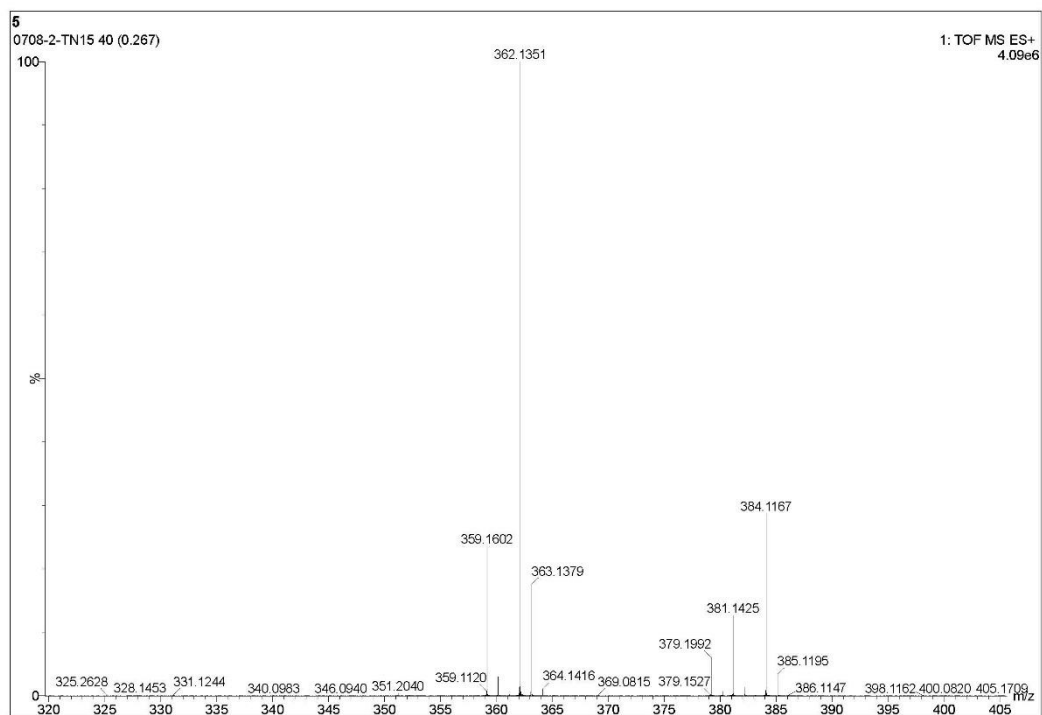

Figure S43. HRMS spectrum of (3,5,6-trimethylpyrazin-2-yl)methyl 4-(2-(nitrooxy)ethoxy)benzoate (**15c**)

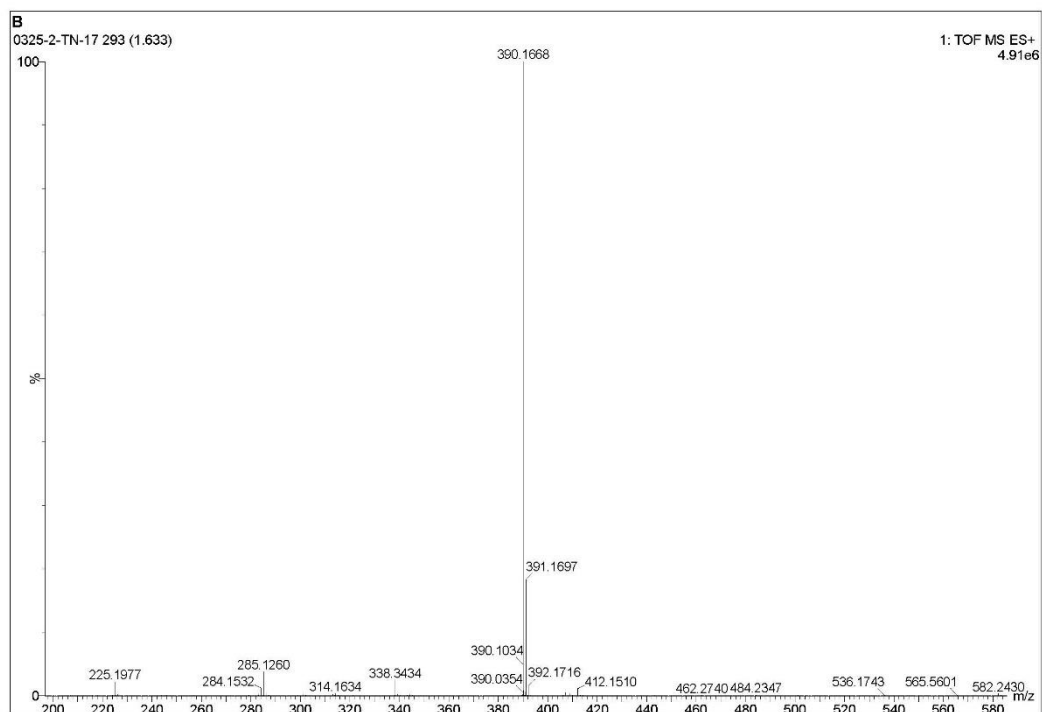

Figure S44. HRMS spectrum of (3,5,6-trimethylpyrazin-2-yl)methyl 3-(4-(nitrooxy)butoxy)benzoate (**15d**)



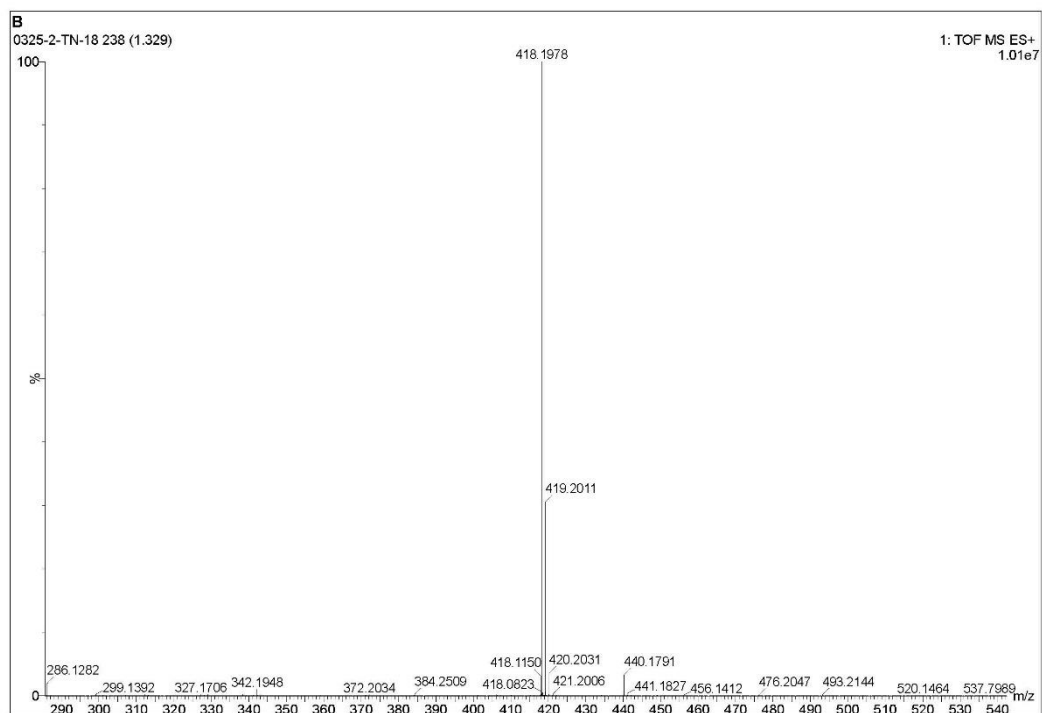

Figure S45. HRMS spectrum of (3,5,6-trimethylpyrazin-2-yl)methyl 3-((6-(nitrooxy)hexyl)oxy)benzoate (**15e**)
